# Supplementary material for: Design and synthesis of new amino-modified iminocyclitols: selective inhibitors of α-galactosidase
Source: Royal Society of Chemistry journal article supplement (doi:10.1039/b926123k), 2010-01-01

**Design and synthesis of new amino-modified iminocyclitols: Selective  
inhibitors of  $\alpha$ -galactosidase**

**Muthupandian Ganesan, Rekhawar V. Madhukarrao and Namakkal G. Ramesh\***

*Department of Chemistry, Indian Institute of Technology- Delhi,  
Hauz Khas, New Delhi-110016, India.  
ramesh@chemistry.iitd.ac.in*

## CONTENTS

|                                                                          |         |
|--------------------------------------------------------------------------|---------|
| EXPERIMENTAL PROCEDURES AND SPECTRAL DATA<br>OF ALL COMPOUNDS            | S3-S11  |
| PROCEDURE FOR ENZYME ASSAY AND CALCULATION OF<br>IC <sub>50</sub> VALUES | S11-S13 |
| COPIES OF NMR SPECTRA                                                    |         |
| <sup>1</sup> H-NMR spectrum of compound <b>9</b>                         | S14     |
| <sup>13</sup> C-NMR spectrum of compound <b>9</b>                        | S15     |
| <sup>1</sup> H-NMR spectrum of compound <b>10</b>                        | S16     |
| <sup>13</sup> C-NMR spectrum of compound <b>10</b>                       | S17     |
| <sup>1</sup> H- <sup>1</sup> H COSY spectrum of compound <b>10</b>       | S18     |
| <sup>1</sup> H-NMR spectrum of compound <b>12</b>                        | S19     |
| <sup>13</sup> C-NMR spectrum of compound <b>12</b>                       | S20     |
| <sup>1</sup> H-NMR spectrum of compound <b>13</b>                        | S21     |
| <sup>13</sup> C-NMR spectrum of compound <b>13</b>                       | S22     |
| <sup>1</sup> H-NMR spectrum of compound <b>14</b>                        | S23     |
| <sup>13</sup> C-NMR spectrum of compound <b>14</b>                       | S24     |
| <sup>1</sup> H-NMR spectrum of compound <b>15</b>                        | S25     |
| <sup>13</sup> C-NMR spectrum of compound <b>15</b>                       | S26     |
| <sup>1</sup> H-NMR spectrum of compound <b>16</b>                        | S27     |
| <sup>13</sup> C-NMR spectrum of compound <b>16</b>                       | S28     |
| <sup>1</sup> H-NMR spectrum of compound <b>17</b>                        | S29     |
| <sup>13</sup> C-NMR spectrum of compound <b>17</b>                       | S30     |
| <sup>1</sup> H-NMR spectrum of compound <b>18</b>                        | S31     |
| <sup>13</sup> C-NMR spectrum of compound <b>18</b>                       | S32     |
| <sup>1</sup> H-NMR spectrum of compound <b>19</b>                        | S33     |
| <sup>13</sup> C-NMR spectrum of compound <b>19</b>                       | S34     |
| <sup>1</sup> H-NMR spectrum of compound <b>20</b>                        | S35     |
| <sup>13</sup> C-NMR spectrum of compound <b>20</b>                       | S36     |
| <sup>1</sup> H-NMR spectrum of compound <b>21</b>                        | S37     |
| <sup>13</sup> C-NMR spectrum of compound <b>21</b>                       | S38     |
| <sup>1</sup> H-NMR spectrum of compound <b>22</b>                        | S39     |
| <sup>13</sup> C-NMR spectrum of compound <b>22</b>                       | S40     |

### General considerations:

All solvents were purified by standard procedures. Anhydrous solvents were dried over sodium wire (benzene, hexane, THF) or molecular sieves (MeOH, DMF, CH<sub>3</sub>CN). Thin-layer chromatography (TLC) was performed on Merck silica gel pre-coated on aluminium plates. Flash column chromatography was performed on 230–400 mesh silica gel. Optical rotations were recorded on an Autopol V (Rudolph Research Flanders, New Jersey) instrument. All the rotations were measured at 589 nm (sodium 'D line). Melting points of the compounds are uncorrected. IR spectra were taken over the 4000–400 cm<sup>-1</sup> range as KBr pellets on a Nicolet (Madison, USA) FTIR spectrophotometer (Model protégé 460). All the <sup>1</sup>H and <sup>13</sup>C NMR spectra were recorded on a 300 MHz Bruker Spectrospin DPX FT-NMR spectrometer. Chemical shifts are reported as  $\delta$  values (ppm) relative to Me<sub>4</sub>Si as internal standard. Mass spectra were recorded on an Applied Biosystems Q-Star instrument. Freeze-drying of samples was done on a Freezone 2.5 (Labconco, USA) lyophilizer.

### 3,4,6-Tri-*O*-benzyl-1,2-dideoxy-1,2-(di-*p*-toluenesulfonamido)-*D*-glucitol **9**:

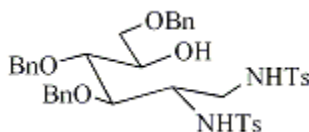

Compound **8**<sup>1</sup> (5.0 g, 6.6 mmol) was taken in a flame dried 100 mL three-necked round bottom flask and 50 mL of THF was added to it. LiAlH<sub>4</sub> (0.377 g, 9.9 mmol) was then added and the reaction mixture was refluxed at 66 °C under argon atmosphere. The progress of the reaction was monitored by TLC. After 20 min., when TLC indicated the disappearance of the starting material, the reaction was then quenched with 10% aqueous HCl (100 mL) and the reaction mixture was extracted with CHCl<sub>3</sub> (3 x 100 mL). The combined organic layer was dried over sodium sulphate, filtered and then concentrated to give **9** in 95% (4.763 g) as colourless low melting solid.  $[\alpha]_D^{28} +0.54$  (*c* 1.5, CHCl<sub>3</sub>).  $\nu_{\max}$  (KBr)/cm<sup>-1</sup>: 3496, 3280, 3032, 2920, 2866, 1451, 1330, 1159, 1088, 814, 742, 699, 666, 552;  $\delta_H$  (300 MHz; CDCl<sub>3</sub>): 7.66 (2H, d, *J* 7.8 Hz), 7.54 (2H, d, *J* 8.1 Hz), 7.35–7.13 (19H, m), 5.30 (1H, br s, exchangeable with D<sub>2</sub>O), 4.71 (1H, br s, exchangeable with D<sub>2</sub>O), 4.68 (2H, d, *J* 11.1 Hz), 4.57–4.44 (4H, m), 4.36 (1H, d, *J* 11.1 Hz), 3.82 (1H, m), 3.68 (1H, m), 3.55–3.52 (2H, m), 3.47–3.37 (2H, m), 2.88 (1H, m), 2.79 (1H, m), 2.38 (3H, s), 2.34 (3H, s);  $\delta_C$  (300 MHz; CDCl<sub>3</sub>): 143.5 (C), 143.3 (C), 137.7 (C), 137.4 (C), 137.1 (C), 136.4 (C), 129.6 (CH), 128.5 (CH), 128.06 (CH), 127.9 (CH), 127.1 (CH), 126.9 (CH), 77.8 (2xCH), 74.7 (CH<sub>2</sub>), 73.9 (CH<sub>2</sub>), 73.3 (CH<sub>2</sub>), 71.1 (CH), 70.7 (CH<sub>2</sub>), 53.8 (CH), 44.4 (CH<sub>2</sub>), 21.4 (2xCH<sub>3</sub>); HRMS (ESI):  $[M+H]^+$ , Found: 759.2734, C<sub>41</sub>H<sub>47</sub>N<sub>2</sub>O<sub>8</sub>S<sub>2</sub> requires 759.2774.

**(2*S*,3*R*,4*R*,5*S*)-2-(*N*-*p*-Toluenesulfonyl)aminomethyl-3,4-dibenzyloxy-5-benzyloxymethyl-1*N*-(*p*-toluenesulfonyl)pyrrolidine 10:**

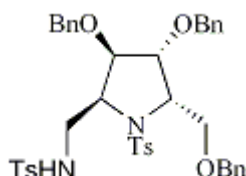

Compound **9** (5.0 g, 6.59 mmol) was taken in a 100 mL flame dried three necked round bottom flask and 30 mL of dry THF was added to it followed by PPh<sub>3</sub> (2.246 g, 8.56 mmol). The reaction mixture was cooled to 0 °C. Diethyl azodicarboxylate, DEAD (1.517 mL, 9.23 mmol) was injected into the reaction mixture drop-wise under argon atmosphere. After the addition was over, the reaction mixture was brought to room temperature. The reaction was found to be completed in 30 min. (vide TLC). The reaction was then stopped and the solvent was evaporated. Flash chromatography (hexane-ethyl acetate 6:1) of resulting residue provided **10** in 90% (4.393 g) yield as a colorless viscous liquid;  $[\alpha]_D^{28}$  -1.1 (*c* 0.53, CHCl<sub>3</sub>);  $\nu_{\max}$  (KBr)/cm<sup>-1</sup>: 3378, 3031, 2923, 2867, 2359, 1497, 1456, 1405, 1334, 1160, 1094, 741, 700, 663, 554;  $\delta_H$  (300MHz; CDCl<sub>3</sub>): 7.71 (2H,d, *J* 8.1 Hz), 7.67 (2H, d, *J* 8.1 Hz), 7.31–7.16 (17H, m), 6.91-6.89 (2H, m), 5.43 (1H, t, *J* = 7.2 Hz, exchangeable with D<sub>2</sub>O), 4.63–4.44 (5H, m), 4.13–3.99 (4H, m), 3.88–3.82 (1H, m), 3.76 (1H, dd, *J* 9.9 Hz, 3.3 Hz), 3.48 (1H, d, *J* 9.9 Hz), 3.44–3.27 (2H, m), 2.39 (3H, s), 2.29 (3H, s);  $\delta_C$  (300 MHz; CDCl<sub>3</sub>): 143.5 (C), 143.1 (C), 137.9 (C), 137.6 (C), 137.4 (C), 137.1 (C), 136.6 (C), 129.6 (CH), 129.5 (CH), 128.6 (CH), 128.5 (CH), 128.1 (CH), 128.1 (CH), 128.01 (CH), 127.9 (CH), 127.5 (CH), 127.4 (CH), 127.3 (CH), 127.2 (CH), 126.8 (CH), 80.1 (CH), 80.7 (CH), 73.5 (CH<sub>2</sub>), 73.3 (CH<sub>2</sub>), 72.6 (CH<sub>2</sub>), 65.6 (CH<sub>2</sub>), 58.4 (CH), 58.3 (CH), 43.8 (CH<sub>2</sub>), 21.5 (CH<sub>3</sub>), 21.5 (CH<sub>3</sub>); HRMS (ESI): [M+H]<sup>+</sup>, Found: 741.2635, C<sub>41</sub>H<sub>45</sub>N<sub>2</sub>O<sub>7</sub>S<sub>2</sub> requires 741.2668.

**(2*S*,3*R*,4*R*,5*S*)-2-Aminomethyl-3,4-dihydroxy-5-hydroxymethyl-pyrrolidine 12:**

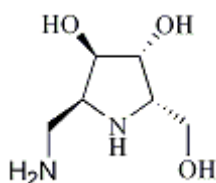

Liquid ammonia (40 mL) was collected in a flame dried 100 mL three-necked round bottom flask at -78 °C. Sodium metal (0.140 g, 6.073 mmol) was added to it. Deep blue colour appeared. Pyrrolidine **10** (1.0 g, 1.35 mmol) dissolved in THF (2 mL) was added to the reaction mixture and stirred at -78 °C for 3 h. The reaction was quenched by the addition of benzene until the blue colour disappeared followed by addition of water (10 mL). The reaction mixture was allowed to slowly warm to room temperature. The crude reaction mixture was dried in a lyophilizer. Column chromatography (CH<sub>3</sub>CN-NH<sub>4</sub>OH 4:1) of the residue over deactivated silica yielded

ADMDP **12** in 86% (0.188 g) as a pale yellow low melting solid.  $[\alpha]_D^{28} +2.3$  (*c* 0.30, D<sub>2</sub>O);  $\nu_{\max}$  (KBr)/cm<sup>-1</sup>: 3451, 2924, 2361, 1717, 1640, 1452, 1330, 1269, 1158, 1095, 812, 754, 706, 667, 553;  $\delta_H$  (300MHz; D<sub>2</sub>O): 4.29 (2H, d, *J* 10.5 Hz) 4.05 (1H, s), 3.90-3.79 (3H, m), 3.43-3.39 (2H, m);  $\delta_C$  (300 MHz; D<sub>2</sub>O): 74.8 (CH), 74.4 (CH), 63.5 (CH), 58.2 (CH), 57.4 (CH<sub>2</sub>), 36.2 (CH<sub>2</sub>); HRMS (ESI): [M+H]<sup>+</sup>, Found: 163.1080, C<sub>6</sub>H<sub>15</sub>N<sub>2</sub>O<sub>3</sub> requires 163.1083.

**(2*S*,3*R*,4*R*,5*S*)-2-(*N*-Acetyl-*N*-*p*-toluenesulfonyl)aminomethyl-3,4-dibenzyloxy-5-benzyloxymethyl-1*N*-(*p*-toluenesulfonyl)pyrrolidine **13**:**

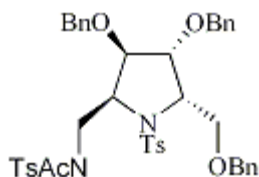

In a 50 mL single necked round bottom flask was taken compound **10** (3.0 g, 3.83 mmol) and dissolved in pyridine (30 mL). DMAP (0.467 g, 3.83 mmol) was then added and reaction mixture was cooled to 0°C. Ac<sub>2</sub>O (0.724 mL, 7.66 mmol) was then added and the reaction mixture was allowed to come at room temperature and stirred for 24 h. The reaction was quenched with 10% aqueous HCl (100 mL) and the reaction mixture was extracted with EtOAc (3 x 150 mL). The organic layer then washed with brine solution and dried over sodium sulphate, filtered and then concentrated. Flash chromatography of crude reaction mixture was performed with hexane-ethyl acetate (6:1) to obtain **13** in 95% yield (3.012 g) as a colourless viscous liquid;  $[\alpha]_D^{25} -1.9$  (*c* 0.58, CHCl<sub>3</sub>);  $\nu_{\max}$  (KBr)/cm<sup>-1</sup>: 3026, 2924, 2861, 2360, 1700, 1645, 1455, 1354, 1162, 1096, 762, 663, 581, 547;  $\delta_H$  (300MHz; CDCl<sub>3</sub>): 7.79 (2H, d, *J* 7.8 Hz), 7.77 (2H, d, *J* 7.5 Hz), 7.29–7.10 (17H, m), 6.93-6.90 (2H, m), 4.66–4.48 (5H, m), 4.43–4.21 (4H, m), 4.14-4.07 (2H, m), 3.96 (1H, dd, *J* 12 Hz), 3.80 (1H, dd, *J* 9.9, 4.2 Hz), 3.57 (1H, d, *J* 9.9 Hz), 2.39 (3H, s), 2.26 (3H, s), 2.18 (3H, s);  $\delta_C$  (300 MHz; CDCl<sub>3</sub>): 170.9 (C), 144.7 (C), 142.9 (C), 138.04 (C), 137.9 (C), 137.9 (C), 137.7 (C), 136.5 (C), 129.8 (CH), 129.6 (CH), 129.2 (CH), 129.02 (CH), 128.3 (CH), 128.2 (CH), 127.9 (CH), 127.8 (CH), 127.6 (CH), 127.4 (CH), 127.2 (CH), 127.1 (CH), 126.9 (CH), 81.3 (CH), 79.6 (CH), 73.3 (CH<sub>2</sub>), 73.2 (CH<sub>2</sub>), 72.5 (CH<sub>2</sub>), 65.2 (CH<sub>2</sub>), 58.8 (CH), 56.4 (CH), 46.2 (CH<sub>2</sub>), 25.1 (CH<sub>3</sub>), 21.6 (CH<sub>3</sub>), 21.4 (CH<sub>3</sub>); HRMS (ESI): [M+Na]<sup>+</sup>, Found: 805.2584, C<sub>43</sub>H<sub>46</sub>N<sub>2</sub>O<sub>8</sub>S<sub>2</sub>Na requires 805.2593.

**General procedure for Na-Hg mediated detosylation reactions.**

In a flame dried 50 mL three necked round bottom flask were taken 3% Na/Hg and Na<sub>2</sub>HPO<sub>4</sub> at room temperature under Ar atmosphere. Compound to be detosylated, dissolved in a solvent mixture (DMF-MeOH 8:1), was then added and the reaction mixture was heated at 60 °C for 3 h

after which the reaction was stopped. The reaction mixture was then filtered through a celite pad. The filtrate was diluted with EtOAc and washed with brine solution, a few times, to remove DMF completely from the reaction mixture. The organic layer was dried over anhydrous sodium sulphate, filtered and then concentrated. Flash chromatography of crude reaction mixture afforded the corresponding detosylated compounds.

**(2*S*,3*R*,4*R*,5*S*)-2-(*N*-*p*-Toluenesulfonyl)aminomethyl-3,4-dibenzyloxy-5-benzyloxymethyl-pyrrolidine 14:**

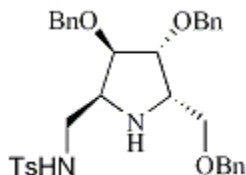

Compound **14** (0.76 g, 96% yield) was obtained as a yellow gummy liquid from the reaction of compound **10** (1.0 g, 1.35 mmol) with 3% Na-Hg (52.0 g, 67.57 mmol) and Na<sub>2</sub>HPO<sub>4</sub> (1.2 g, 6.76 mmol) following the general procedure described above. Product **14** was purified by column chromatography over silica using hexane-ethyl acetate (2:1).  $[\alpha]_D^{28}$  -6.08 (*c* 0.44, CHCl<sub>3</sub>);  $\nu_{\max}$  (KBr)/cm<sup>-1</sup>: 3309, 3031, 2922, 2858, 1956, 1878, 1811, 1722, 1598, 1454, 1329, 1214, 1158, 1088, 910, 813, 741, 698, 664, 604, 552;  $\delta_H$  (300MHz; CDCl<sub>3</sub>): 7.65 (2H, d, *J* 8.1 Hz), 7.36- 7.22 (17H, m), 4.57- 4.53 (5H, m), 4.35 (1H, d, *J* 11.7 Hz), 4.0 – 3.97 (2H, m), 3.64 – 3.52 (4H, m), 3.12(1H, dd, *J* 12.6, 6.3 Hz), 2.97(1H, dd, *J* 18.6, 6.3 Hz), 2.44 (3H, s);  $\delta_C$  (300 MHz; CDCl<sub>3</sub>): 142.9 (C), 138.04 (C), 137.8 (C), 137.5 (C), 136.8 (C), 129.5 (CH) 128.5 (CH), 128.3 (CH), 128.3 (CH), 127.9 (CH), 127.7 (CH), 127.6 (CH), 127.6 (CH), 127.3 (CH), 126.9 (CH), 126.8 (CH), 82.8 (CH), 82.2 (CH), 73.2 (CH<sub>2</sub>), 72.01 (CH<sub>2</sub>), 71.9 (CH<sub>2</sub>), 68.9 (CH<sub>2</sub>), 64.8 (CH), 58.4 (CH), 57.6 (CH<sub>2</sub>), 43.4 (CH<sub>2</sub>), 21.3 (CH<sub>3</sub>); HRMS (ESI): [M+H]<sup>+</sup>, Found: 587.2586, C<sub>34</sub>H<sub>39</sub>N<sub>2</sub>O<sub>5</sub>S requires 587.2580.

**(2*S*,3*R*,4*R*,5*S*)-2-(*p*-Toluenesulfonyl)aminomethyl-3,4-dihydroxy-5-hydroxymethyl-pyrrolidine 15:**

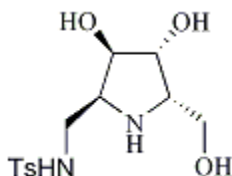

10% palladium on charcoal (1.5 g, 300% w/w) was taken in a 50 mL three-necked round bottom flask. Compound **14** (0.5 g, 0.85 mmol) dissolved in methanol (10 mL) was added to the reaction flask. H<sub>2</sub> gas was then bubbled slowly into reaction mixture for 5 h at 30 °C. The reaction mixture was then filtered through a celite pad. The filtrate was collected and the solvent

was evaporated to yield compound **15** as a white solid in 90% (0.243 g). mp 182 °C (recrystallized from MeOH/THF);  $[\alpha]_D^{28} +7.4$  (*c* 0.35, H<sub>2</sub>O);  $\nu_{\max}$  (KBr)/cm<sup>-1</sup>: 3150, 1745, 1632, 1406, 1325, 1158, 1089, 815, 666, 554;  $\delta_H$  (300MHz; D<sub>2</sub>O): 7.73 (2H, br s), 7.42 (2H, br s), 4.309 (1H, br s), 4.21 (1H, s), 3.94 (4H, m), 3.26 (2H, m), 2.37 (3H, s);  $\delta_C$  (300 MHz; D<sub>2</sub>O): 145.4 (C), 134.2 (C), 130.2 (CH), 126.8 (CH), 74.5 (CH), 74.4 (CH), 63.3 (CH), 61.05 (CH), 57.4 (CH<sub>2</sub>), 39.5 (CH<sub>2</sub>), 20.7 (CH<sub>3</sub>); HRMS (ESI): [M+H]<sup>+</sup>, Found: 317.1156, C<sub>13</sub>H<sub>21</sub>N<sub>2</sub>O<sub>5</sub>S requires 317.1171.

### General procedure for alkylation of compound **10**:

Compound **10** was taken in a flame dried three-necked round bottom flask and dissolved in dry DMF. Sodium hydride was added to it at 0 °C followed by alkyl halide and the reaction mixture was stirred at room temperature for the specified time after which the reaction was stopped. The reaction was then quenched with iced water. The reaction mixture was diluted with EtOAc and washed with brine solution, a few times, to remove DMF completely from the reaction mixture. The organic layer was dried over anhydrous sodium sulphate, filtered and then concentrated. Flash chromatography of crude reaction mixture afforded the corresponding alkylated compounds.

### (2*S*,3*R*,4*R*,5*S*)-2-(*N*-Methyl-*N*-*p*-toluenesulfonyl)aminomethyl-3,4-dibenzyloxy-5-benzyloxymethyl-1*N*-(*p*-toluenesulfonyl)pyrrolidine **16**:

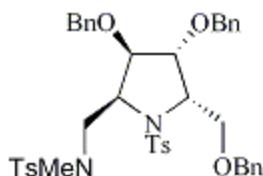

Compound **16** (1.814 g, 89% yield) was obtained in 3 h as a white crystalline solid from the reaction of compound **10** (2.0 g, 2.69 mmol) with NaH (0.432 g of 60% suspension in mineral oil) and methyl iodide (0.252 mL, 4.05 mmol) following the general procedure described above. Product **16** was purified by column chromatography over silica using hexane-ethyl acetate (8:1). mp 110 °C (recrystallized from benzene/hexane);  $[\alpha]_D^{27} +28.4$  (*c* 0.69, CHCl<sub>3</sub>);  $\nu_{\max}$  (KBr)/cm<sup>-1</sup>: 3029, 2918, 2865, 1717, 1594, 1491, 1453, 1338, 1157, 1088, 1018, 810, 747, 699, 659, 601, 546;  $\delta_H$  (300MHz; CDCl<sub>3</sub>): 7.89 (2H, d, *J* 7.8 Hz), 7.84 (2H, d, *J* 8.1 Hz), 7.33 - 7.19 (17H, m), 6.89 (2H, m), 4.78 (1H, d, *J* 11.7 Hz), 4.64 (1H, d, *J* 11.7 Hz), 4.56 - 4.49 (4H, m), 4.11 - 3.88 (5H, m), 3.79-3.76 (1H, m), 3.60 (1H, d, *J* 9.0 Hz), 2.88-2.80 (1H, m), 2.66 (3H, s), 2.43 (3H, s), 2.29 (3H, s);  $\delta_C$  (300 MHz; CDCl<sub>3</sub>): 143.5 (C), 142.9 (C), 137.9 (C), 137.8 (C), 137.5 (C), 132.2 (C), 129.6 (CH), 129.3 (CH), 128.3 (CH), 128.2 (CH), 127.9 (CH), 127.8 (CH), 127.6 (CH), 127.5 (CH), 127.3 (CH), 127.1 (CH), 126.8 (CH), 81.03

(CH), 79.1 (CH), 73.5 (CH<sub>2</sub>), 73.01 (CH<sub>2</sub>), 72.5 (CH<sub>2</sub>), 65.2 (CH<sub>2</sub>), 59.2 (CH), 58.8 (CH), 51.9 (CH<sub>2</sub>), 38.9 (CH<sub>3</sub>), 21.5 (CH<sub>3</sub>), 21.4 (CH<sub>3</sub>); HRMS (ESI): [M+H]<sup>+</sup>, Found: 755.2818, C<sub>42</sub>H<sub>47</sub>N<sub>2</sub>O<sub>7</sub>S<sub>2</sub> requires 755.2825.

**(2*S*,3*R*,4*R*,5*S*)-2-(*N*-Ethyl-*N*-*p*-toluenesulfonyl)aminomethyl-3,4-dibenzyloxy-5-benzyloxymethyl-1*N*-(*p*-toluenesulfonyl)pyrrolidine **17**:**

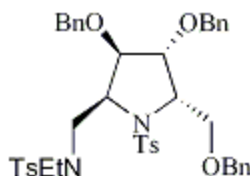

Compound **17** (2.413 g, 93% yield) was obtained in 5 h as colourless liquid from the reaction of compound **10** (2.5 g, 3.37 mmol) with NaH (0.404 g of 60% suspension in mineral oil) and ethyl iodide (0.329 mL, 4.05 mmol) following the general procedure described above. Product **17** was purified by column chromatography over silica using hexane-ethyl acetate (6:1).  $[\alpha]_D^{28} +35.8$  (*c* 0.48, CHCl<sub>3</sub>);  $\nu_{\max}$ (KBr)/cm<sup>-1</sup>: 3409, 3062, 3031, 2929, 2871, 1710, 1598, 1494, 1453, 1453, 1340, 1155, 1092, 908, 814, 731, 699, 662, 598, 548;  $\delta_H$  (300MHz; CDCl<sub>3</sub>) : 7.86 (2H, d, *J* 8.4 Hz), 7.83 (2H,d, *J* 8.4 Hz), 7.30-7.13 (17H, m), 6.96-6.94 (2H, m), 4.71 (1H, d, *J* 11.7 Hz), 4.64-4.60 (2H, m), 4.53-4.47 (1H, dd, *J* 11.7, 4.5 Hz), 4.40 (1H, t, *J* 6.3Hz), 4.15 (1H, d, *J* 11.7Hz), 4.07-4.03 (2H, m), 3.95 (1H, d, *J* 14.4 Hz), 3.77-3.68 (4H ,m), 3.45-3.37 (1H, m), 3.25-3.14 (2H, m), 2.41 (3H, s), 2.29 (3H, s), 0.75 (3H, t, *J* 7.2 Hz );  $\delta_C$  (300 MHz; CDCl<sub>3</sub>): 143.3 (C), 143.1 (C), 138.0 (C), 137.9 (C), 137.9 (C), 137.8 (C), 136.4 (C), 129.7 (CH), 129.4 (CH), 128.4 (CH), 128.3 (CH), 128.1 (CH), 127.9 (CH) 127.8 (CH), 127.7 (CH), 127.6 (CH), 127.5 (CH), 127.4 (CH), 127.3 (CH), 127.04 (CH), 80.7 (CH), 78.9 (CH), 73.2 (CH<sub>2</sub>), 73.04 (CH<sub>2</sub>), 72.7 (CH<sub>2</sub>), 65.5 (CH<sub>2</sub>), 59.9 (CH), 59.7 (CH), 48.01 (CH<sub>2</sub>), 45.3 (CH<sub>2</sub>), 21.59 (CH<sub>3</sub>), 21.53 (CH<sub>3</sub>), 12.2 (CH<sub>3</sub>); HRMS (ESI): [M+Na]<sup>+</sup>, Found:791.2810, C<sub>43</sub>H<sub>48</sub>N<sub>2</sub>O<sub>7</sub>S<sub>2</sub>Na requires 791.2801.

**(2*S*,3*R*,4*R*,5*S*)-2-(*N*-Methyl)aminomethyl-3,4-dibenzyloxy-5-benzyloxymethyl-pyrrolidine **18**:**

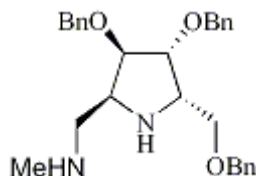

Compound **18** (0.408 g, 69% yield) was obtained as a yellow gummy liquid from the reaction of compound **16** (1.0 g, 1.32 mmol) with 3% Na-Hg (126.939 gm, 165.57 mmol) and Na<sub>2</sub>HPO<sub>4</sub> (2.948 gm, 16.56 mmol) following the general procedure described above. Product **18** was purified by column chromatography over silica using CHCl<sub>3</sub>:MeOH:NH<sub>4</sub>OH (100:2.5:2.5) as a solvent mixture.  $[\alpha]_D^{27} 14.7$  (*c* 0.43, CHCl<sub>3</sub>);  $\nu_{\max}$ (KBr)/cm<sup>-1</sup>: 3835, 3020, 2924, 2861, 2963, 1709, 1552, 1459, 1407, 1218, 1099, 764, 694;  $\delta_H$  (300MHz; CDCl<sub>3</sub>): . 7.37-7.26



(15H, m), 4.58- 4.48 (5H, m), 4.40 (1H, d,  $J$  12Hz), 4.03- 3.93 (2H, m), 3.68- 3.49 (4H, m), 2.73– 2.67 (2H, m), 2.41 (3H, s), 1.96 (2H, br s,  $NH$ , exchangeable with  $D_2O$ ),  $\delta_C$  (300 MHz;  $CDCl_3$ ): 138.3 (C), 138.2 (C), 137.1 (C), 128.4 (CH), 127.3 (CH), 128.3 (CH), 127.8 (CH), 127.7 (CH), 127.7 (CH), 127.6 (CH), 127.5 (CH), 83.04 (CH), 82.4 (CH), 73.3 ( $CH_2$ ), 72.2 ( $CH_2$ ), 71.9 ( $CH_2$ ), 69.6 ( $CH_2$ ), 58.5 (2xCH), 51.7 ( $CH_2$ ), 36.7 ( $CH_3$ ); HRMS (ESI):  $[M+H]^+$ , Found: 447.2647,  $C_{28}H_{35}N_2O_3$  requires 447.2648.

**(2*S*,3*R*,4*R*,5*S*)-2-(*N*-Ethyl)aminomethyl-3,4-dibenzyloxy-5-benzyloxymethyl-pyrrolidine 19:**

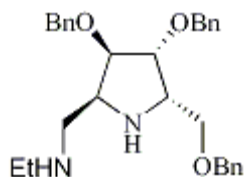

Compound **19** (0.449 g, 75% yield) was obtained as a yellow gummy liquid from the reaction of compound **17** (1.0 g, 1.3 mmol) with 3% Na-Hg (124.62 g, 162.55 mmol) and  $Na_2HPO_4$  (2.893 g, 16.26 mmol) following the general procedure described above. Product **19** was purified by column chromatography over silica using  $CHCl_3:MeOH:NH_4OH$  (10:0.1:0.1) as a solvent mixture.  $[\alpha]_D^{28} +8.9$  ( $c$  0.76,  $CHCl_3$ );  $\nu_{max}$  (KBr)/ $cm^{-1}$ : 3323, 3061, 3031, 2863, 1955, 1877, 1813, 1649, 1608, 1491, 1455, 1362, 1309, 1208, 1095, 1208, 1095, 911, 808, 697, 608, 465 and;  $\delta_H$  (300MHz;  $CDCl_3$ ): 7.34-7.28 (15H, m), 4.60-4.50 (5H, m), 4.42 (d, 1H,  $J$  12 Hz), 4.06-3.97 (2H, m), 3.72-3.52 (4H, m), 2.84-2.73 (2H, m), 2.65 (2H, q,  $J$  7.2 Hz), 2.07 (2H, br s,  $NH$  exchangeable with  $D_2O$ ), 1.08 (3H, t,  $J$  7.2 Hz);  $\delta_C$  (300 MHz;  $CDCl_3$ ): 138.1 (C), 137.9 (C), 137.7 (C), 128.5 (CH), 128.4 (CH), 127.9 (CH), 127.8 (CH), 128.1 (CH), 127.8 (CH), 127.7 (CH), 127.3 (CH), 126.9 (CH), 82.7 (CH), 82.2 (CH), 73.4 ( $CH_2$ ), 72.4 (2x $CH_2$ ), 69.1 ( $CH_2$ ), 58.7 (CH), 57.1 (CH), 48.7 ( $CH_2$ ), 43.9 ( $CH_2$ ), 13.5 ( $CH_3$ ); HRMS (ESI):  $[M+H]^+$ , Found: 461.2806,  $C_{29}H_{37}N_2O_3$  requires 461.2804.

**(2*S*,3*R*,4*R*,5*S*)-2-(*N*-Methyl)aminomethyl-3,4-dihydroxy-5-hydroxymethyl-pyrrolidine 20:**

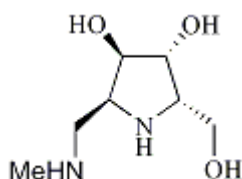

10% palladium on charcoal (0.4 g, 100% w/w) was taken in a 50 mL three-necked round bottom flask. Compound **18** (0.4 g, 0.89 mmol) dissolved in methanol (14 mL) was added to the reaction flask followed by the addition of 10% HCl in methanol (1.75 mL).  $H_2$  gas was then bubbled slowly into reaction mixture for 12 h at 30 °C. The reaction mixture was then filtered through a celite pad and the filtrate was evaporated to get compound **20** as its hydrochloride salt which was then basified with triethylamine until pH 12.0. Further purification of the product by

column chromatography with CH<sub>3</sub>CN-NH<sub>4</sub>OH (1:1) afforded the free base **20** in 94% (0.148 g) yield as a low melting white solid;  $[\alpha]_D^{28} +3.8$  (*c* 1.6, H<sub>2</sub>O);  $\nu_{\max}$  (KBr)/cm<sup>-1</sup>: 3379, 1631, 1406, 1082, 571;  $\delta_H$  (300MHz; D<sub>2</sub>O): 4.31 (2H, m), 4.11-4.08 (1H, m), 3.90-3.79 (3H, m), 3.51 (1H, dd, *J* 13.5, 6.0Hz), 3.41 (1H, dd, *J* 13.5, 6.6 Hz), 2.75 (3H, s);  $\delta_C$  (300 MHz; D<sub>2</sub>O): 75.2 (CH), 74.7 (CH), 63.5 (CH), 57.8 (CH<sub>2</sub>), 57.3 (CH), 45.9 (CH<sub>2</sub>), 33.8 (CH<sub>3</sub>); HRMS (ESI): [M+Na]<sup>+</sup>, Found: 199.1062, C<sub>7</sub>H<sub>16</sub>N<sub>2</sub>O<sub>3</sub>Na requires 199.1059.

**(2*S*,3*R*,4*R*,5*S*)-2-(*N*-ethyl)aminomethyl-3,4-dihydroxy-5-hydroxymethyl-pyrrolidine **21**:**

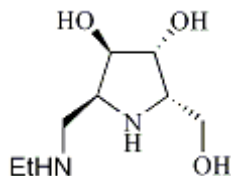

10% palladium on charcoal (0.4 g, 100% w/w) was taken in a 50 ml three necked round bottom flask. Compound **19** (0.4 g, 0.87 mmol) dissolved in methanol (14 mL) was added to the reaction flask followed by the addition of 10% HCl in methanol (1.75 mL). H<sub>2</sub> gas was then bubbled slowly into reaction mixture for 12 h at 30 °C. The reaction mixture was then filtered through a celite pad and the filtrate was evaporated to get compound **21** as its hydrochloride salt which was then basified with triethylamine until pH 12.0. Further purification of the product by column chromatography with CH<sub>3</sub>CN-NH<sub>4</sub>OH (1:1) afforded **21** in 90% (0.149 g) as a low melting white solid;  $[\alpha]_D^{28} +5.6$  (*c* 0.90, H<sub>2</sub>O);  $\nu_{\max}$  (KBr)/cm<sup>-1</sup>: 3423, 2924, 2854, 2362, 1742, 1626, 1403, 1248, 1176, 1083, 555, 435, 403;  $\delta_H$  (300MHz; D<sub>2</sub>O): 4.22-4.18 (2H, m), 3.92-3.9 (1H, m), 3.79-3.67 (3H, m), 3.38 (1H, dd, *J* 13.5, 6.0 Hz), 3.27 (1H, dd, *J* 13.5, 6.6Hz), 3.03 (2H, q, *J* 7.5Hz), 1.15 (3H, t, *J* 7.5Hz);  $\delta_C$  (300 MHz; D<sub>2</sub>O): 75.3 (CH), 74.9 (CH), 62.9 (CH), 57.9 (CH<sub>2</sub>), 57.1 (CH), 44.2 (CH<sub>2</sub>), 44.02 (CH<sub>2</sub>), 10.6 (CH<sub>3</sub>); HRMS (ESI): [M+H]<sup>+</sup>, Found: 191.1396, C<sub>8</sub>H<sub>19</sub>N<sub>2</sub>O<sub>3</sub> requires 191.1396.

**(2*S*,3*R*,4*R*,5*S*)-2-(*N*-Acetyl)aminomethyl-3,4-dihydroxy-5-hydroxymethyl-pyrrolidine **22**:**

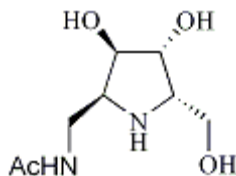

In flame dried 50 mL three-necked round bottom flask was taken compound **10** (1.0 g, 6.17 mmol). Acetic anhydride (0.582mL, 6.17 mmol) was added to it at 0 °C under argon atmosphere. The reaction mixture was sonicated under solvent free condition for 15 minutes at room temperature, after which the reaction was quenched with liquor ammonia until the solution reaches a pH of 9. Column purification using CH<sub>3</sub>CN-NH<sub>4</sub>OH (1:1) afforded compound **22** in

85% (1.07 g) yield as low melting white solid.  $[\alpha]_D^{28} -4.3$  (*c* 0.73, H<sub>2</sub>O);  $\nu_{\max}$  (KBr)/cm<sup>-1</sup>: 3183, 2304, 1649, 1406, 1099, 618;  $\delta_H$  (300MHz; D<sub>2</sub>O): 4.27 (1H, br s), 4.21 (1H, br s), 3.94-3.79 (4H, m), 3.54-3.52 (2H, m), 1.94 (3H, s);  $\delta_C$  (300 MHz; D<sub>2</sub>O): 175.2 (C), 74.7 (CH), 74.3 (CH), 63.2 (CH), 60.9 (CH), 57.5 (CH<sub>2</sub>), 36.3 (CH<sub>2</sub>), 21.9 (CH<sub>3</sub>); HRMS (ESI): [M+1]<sup>+</sup>, Found: 205.1190, C<sub>8</sub>H<sub>17</sub>N<sub>2</sub>O<sub>4</sub> requires 205.1188.

### General procedure for enzyme assay and calculation of IC<sub>50</sub> values:

Our experimental design was to measure enzyme velocity at constant substrate concentration with varying concentrations of an inhibitor,<sup>2</sup> spectrophotometrically,<sup>3</sup> by carrying out the inhibition assay of the glycosidases in the presence of the iminosugars as inhibitors utilizing the corresponding *p*-nitrophenyl glycosides as the substrates.

$\alpha$ -Glucosidase type I from Baker's yeast,  $\alpha$ -galactosidase from green coffee beans,  $\beta$ -galactosidase from *Escherichia coli* and *p*-nitrophenyl- $\alpha$ -D-galactopyranoside were purchased from Sigma Chemicals Co. USA.

$\beta$ -glucosidase from almond, *p*NP- $\alpha$ -D-glucofuranoside, *p*NP- $\beta$ -D-glucofuranoside and *p*NP- $\beta$ -D-galactopyranoside were purchased from SRL Chemicals Ltd., India.

Glycosidase was pre-incubated with various concentrations (0.5-12 mM) of inhibitor for 30 minutes at its optimum pH and temperature. 20 $\mu$ L of 25mM *p*-nitrophenyl glycopyranoside (*p*-NPG) in 0.1M phosphate buffer was added to the reaction mixture to initiate the reaction. In the case of  $\beta$ -glucosidase acetate buffer was used. The final volume of the reaction mixture was adjusted to 1.1 mL with buffer. Control was also run in parallel without inhibitor. The reaction was then incubated at the same pH and temperature for 10 minutes and quenched by adding 1mL of 1M Na<sub>2</sub>CO<sub>3</sub> solution. The glycosidase activity was determined by measuring the *p*-nitrophenol released from *p*-nitrophenyl glycopyranosides at 405 nm using Shimadzu UV-Visible Spectrophotometer (Model UV-1800). IC<sub>50</sub> values were determined by plotting experimental data as  $V_i/V_0$  (fractional activity) versus the inhibitor concentration [I] at a constant concentration of substrate, where  $V_i$  and  $V_0$  represent the enzyme velocity (activity) in the presence and absence of inhibitor, respectively. IC<sub>50</sub> values were calculated from the inhibitor concentration [I] corresponding to fractional activity of 0.5. IC<sub>50</sub> value was defined as the concentration of the inhibitor to inhibit 50% of enzyme activity under the assay conditions.

Each experiment was repeated **thrice** to get a range of IC<sub>50</sub> values and the mean IC<sub>50</sub> values were reported in the manuscript.

### Preparations:

Buffer solutions: 0.1M phosphate buffer for all enzymes.  
For  $\beta$ -glucosidase 0.1M acetate buffer was used.  
Quencher : 1M sodium carbonate for all experiments

Enzyme solution: 0.3 mg/mL for  $\alpha$ - and  $\beta$ -glucosidase  
0.045 mg/mL for  $\alpha$ -galactosidase  
0.1 mg/mL for  $\beta$ -galactosidase  
Substrate concentration: 25 mM made from buffer in all cases  
Inhibitor concentration: Made from buffer in varying concentrations ranging from 0.5 mM to 15 mM

**Standardisation:** OD values were standardized in terms of amount of *p*-nitrophenol under given buffer condition,

1 OD = X micromoles of *p*-nitrophenol (*p*NP)

From experimental values, OD in terms of amount of *p*-nitrophenol were obtained as follows:

1 OD = 0.093183 micromoles of *p*-nitrophenol for  $\alpha$ -glucosidase

1 OD = 0.105579 micromoles of *p*-nitrophenol for  $\beta$ -glucosidase

1 OD = 0.092232 micromoles of *p*-nitrophenol for  $\alpha$ -galactosidase

1 OD = 0.079403 micromoles of *p*-nitrophenol for  $\beta$ -galactosidase

**Activity:** Enzyme activities were calculated as follows:

20  $\mu$ L of Z mg/mL of Enzyme gives OD value of Y in 10 minutes of incubation period with 20  $\mu$ L of 25 mM Substrate

i.e.,

$$\begin{aligned} 20 \mu\text{L} \times Z \text{ mg/mL} \times 10 \text{ min} &= Y \text{ OD} \\ &= Y \times X \quad \{\text{as } 1 \text{ OD} = X \mu\text{moles of } p\text{-nitrophenol (pNP)}\} \\ \text{Activity} &= (Y \times X) / (20 \times Z \times 10 \times 10^{-3}) \\ &= (Y \times X \times 1000) / (20 \times Z \times 10) \\ &= V \text{ moles/mg/min.} \end{aligned}$$

Y is the absorbance (@ 405 nm) of the *p*-nitrophenol released at the end of the reaction.

Z is the concentration of the enzyme solution (0.3 mg/mL for  $\alpha$ - and  $\beta$ -glucosidase; 0.045 mg/mL for  $\alpha$ -galactosidase, 0.1 mg/mL for  $\beta$ -galactosidase).

20  $\mu$ L of enzyme solution and 20  $\mu$ L of substrate solution were used in each experiment.

Activity at zero concentration of inhibitor =  $V_0$   
(in the absence of inhibitor)

Activity at various concentrations of inhibitor =  $V_i$

Fractional activity =  $V_i/V_0$

**Plot:** (Concentration-response plot)

Fractional activity ( $V_i/V_0$ ) (on the Y-axis) was plotted against inhibitor concentration [I] (on the X-axis)

IC<sub>50</sub> values were calculated from the inhibitor concentration [I] corresponding to fractional activity of 0.5.

**Result:**

Compounds **12** and **22** did not inhibit any of the enzymes up to 12 mM concentration. The inhibition studies of compounds **15**, **20** and **21** are given in Table 1 below.

Table 1: Inhibition activities of compounds **15**, **20** and **21**

| Inhibitor | Enzyme                       | Source                  | Condition               | IC <sub>50</sub> (mM) |        |        | Range (mM) | Mean IC <sub>50</sub> (mM) |
|-----------|------------------------------|-------------------------|-------------------------|-----------------------|--------|--------|------------|----------------------------|
|           |                              |                         |                         | Exp. 1                | Exp. 2 | Exp. 3 |            |                            |
| <b>15</b> | $\alpha$ -glucosidase type 1 | Baker's yeast           | 37 °C, 10 min, pH = 6.8 | 3.6                   | 3.7    | 3.3    | 3.3-3.6    | 3.5                        |
| <b>15</b> | $\beta$ -glucosidase         | Almond                  | 37 °C, 10 min, pH = 5   | 5.6                   | 6.5    | 6.9    | 5.6-6.9    | 6.3                        |
| <b>15</b> | $\beta$ -galactosidase       | <i>Escherichia coli</i> | 37 °C, 10 min, pH = 7.3 | 6.1                   | 5.4    | 4.8    | 4.8-6.1    | 5.4                        |
| <b>20</b> | $\alpha$ -galactosidase      | Green coffee beans      | 25 °C, 10 min, pH = 6.5 | 6.3                   | 6.7    | 7.8    | 6.3-7.8    | 6.9                        |
| <b>21</b> | $\alpha$ -galactosidase      | Green coffee beans      | 25 °C, 10 min, pH = 6.5 | 8.8                   | 8.2    | 7.3    | 7.3-8.8    | 8.1                        |

**References:**

- (1) (a) Kumar, V.; Ramesh, N. G. *Org. Biomol. Chem.* **2007**, *5*, 3847. (b) Kumar, V.; Ramesh, N. G. *Chem. Commun.* **2006**, 4952
- (2) Hamilton-Miller, J. M. T. *Biochem. J.* 1966, **101**, 40c.
- (3) Li, Y.-T.; S.; Li, S.-C. in *Methods in Enzymology*; Ginsberg, V., Ed.; Academic Press, 1972, vol. 28, part B, p. 702.

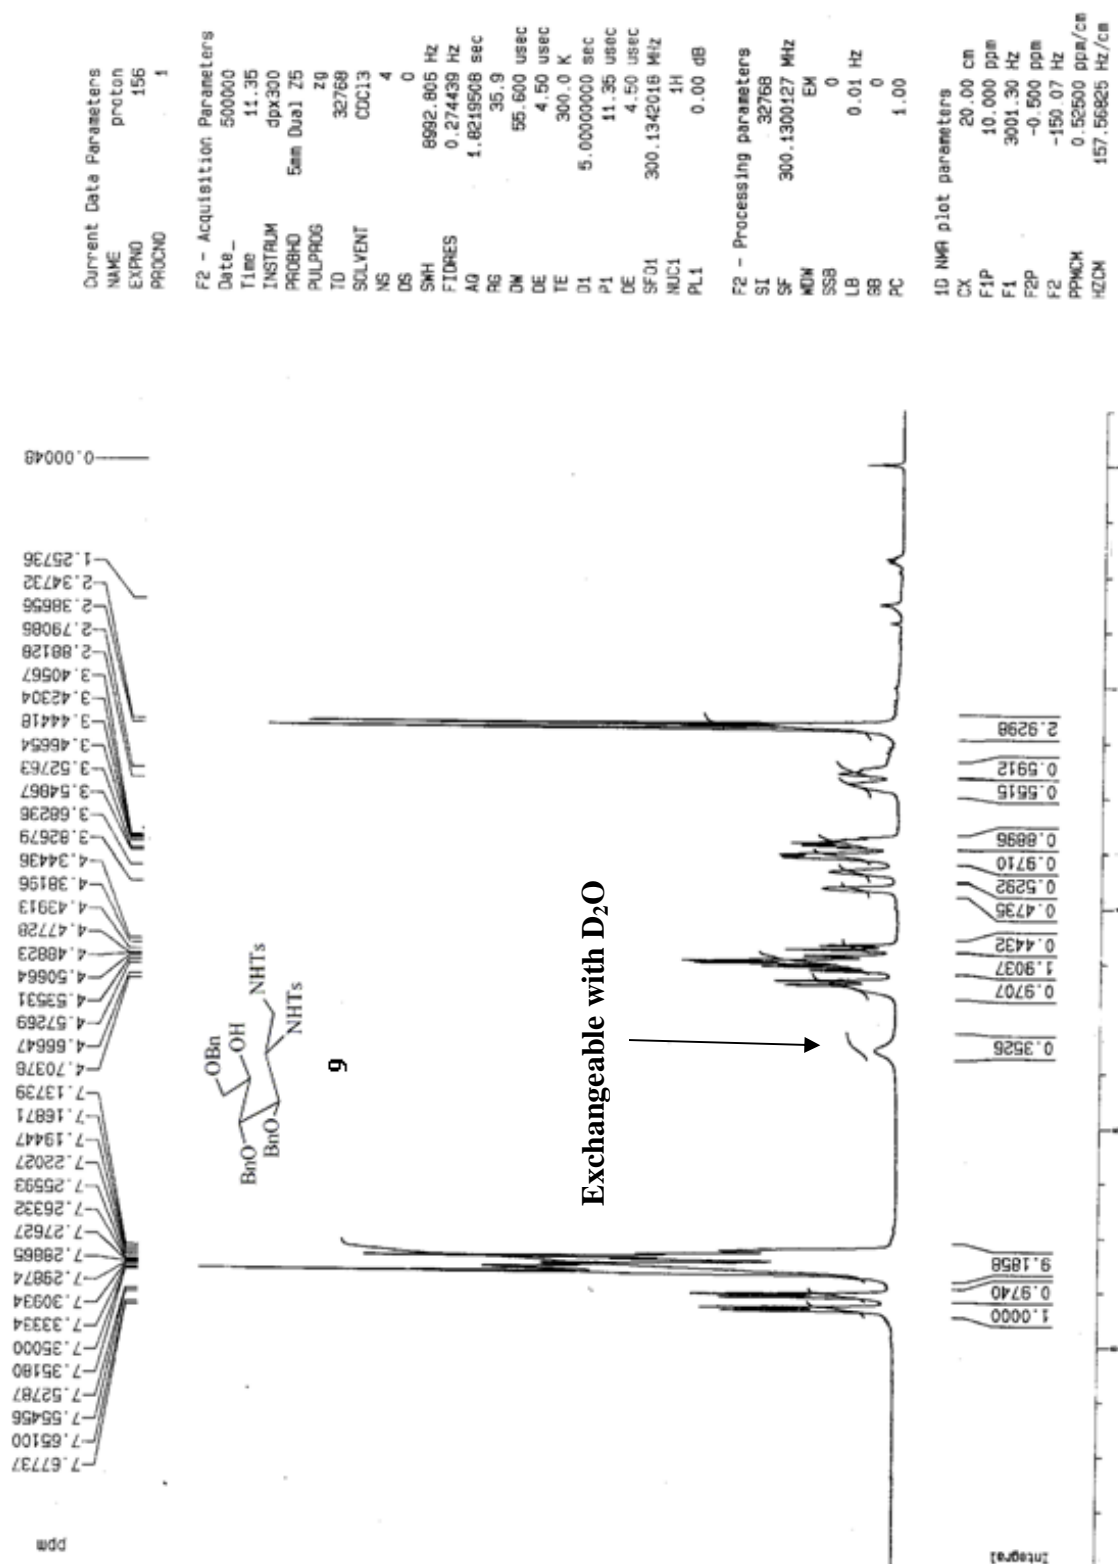

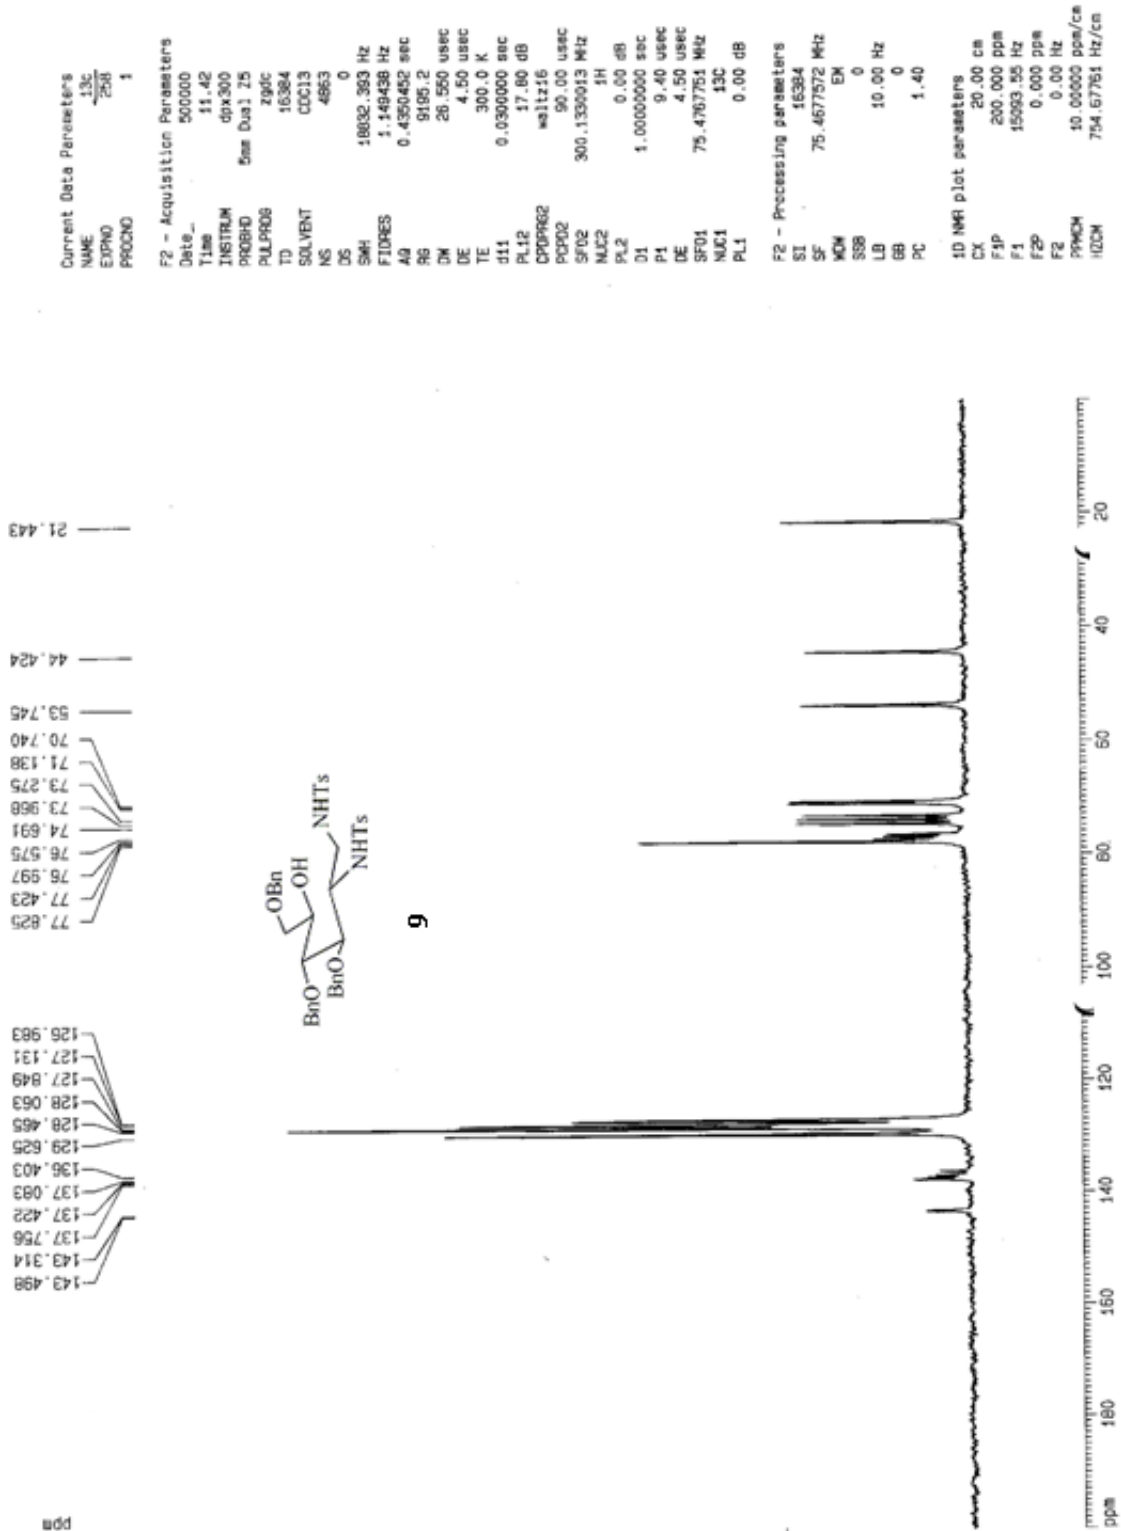

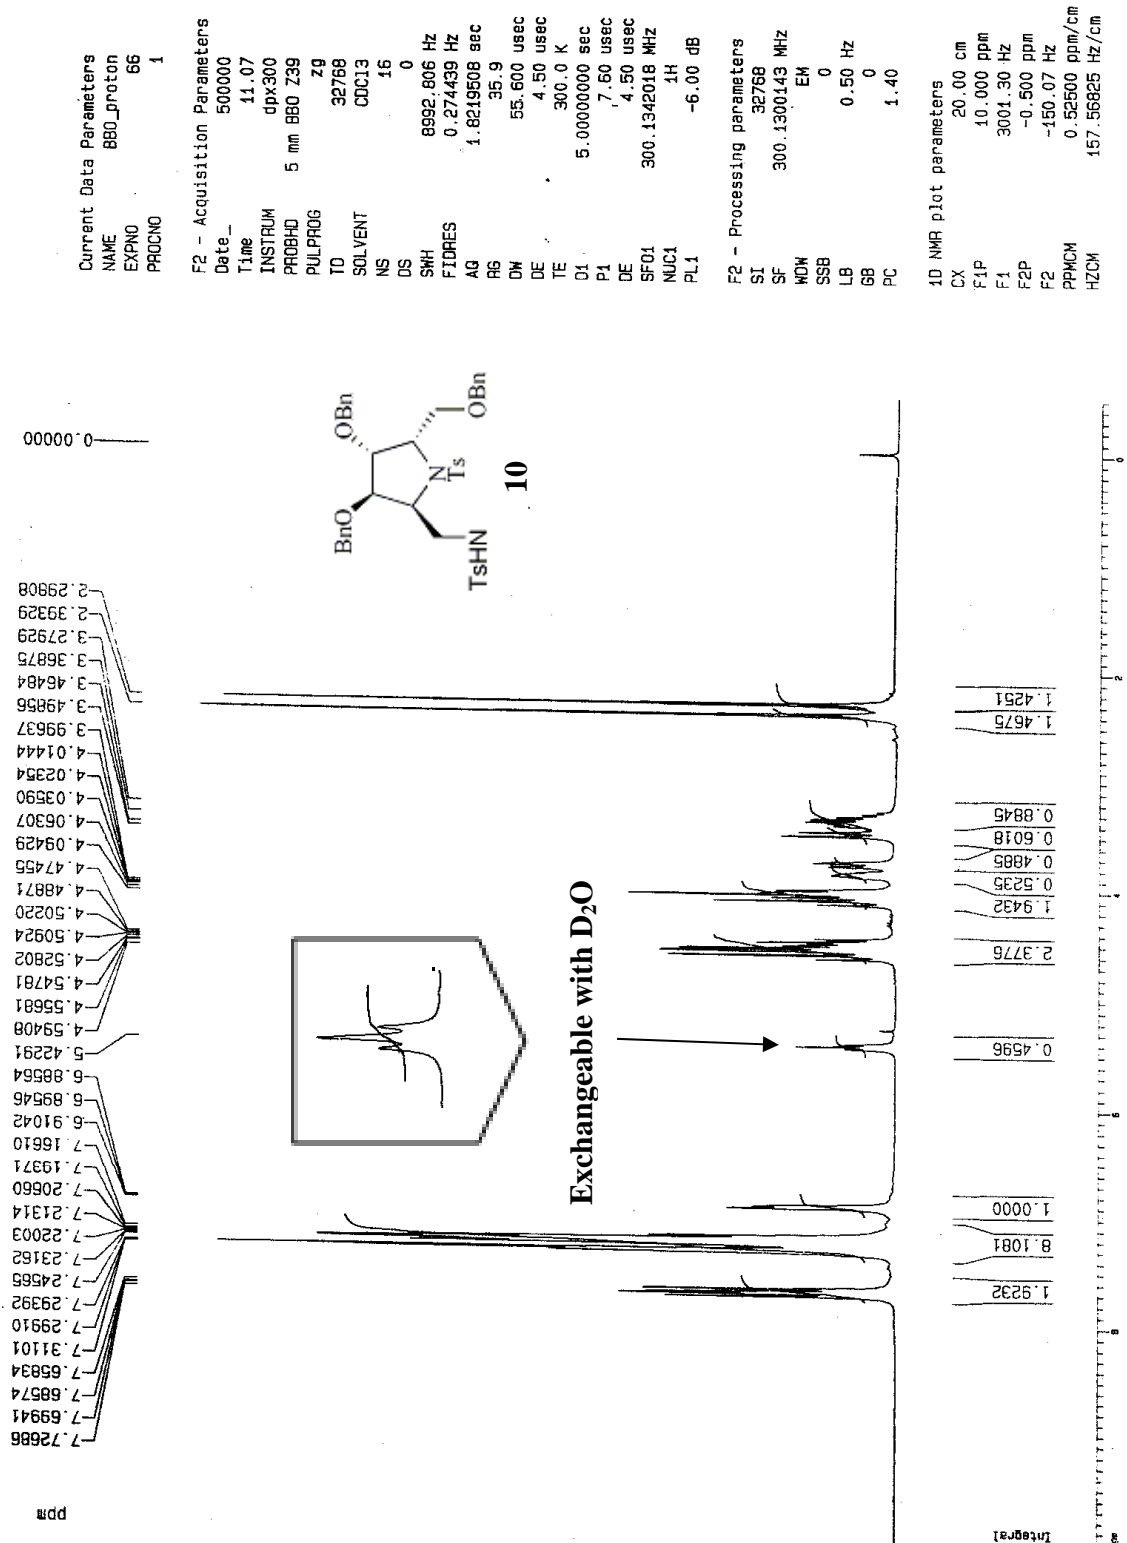



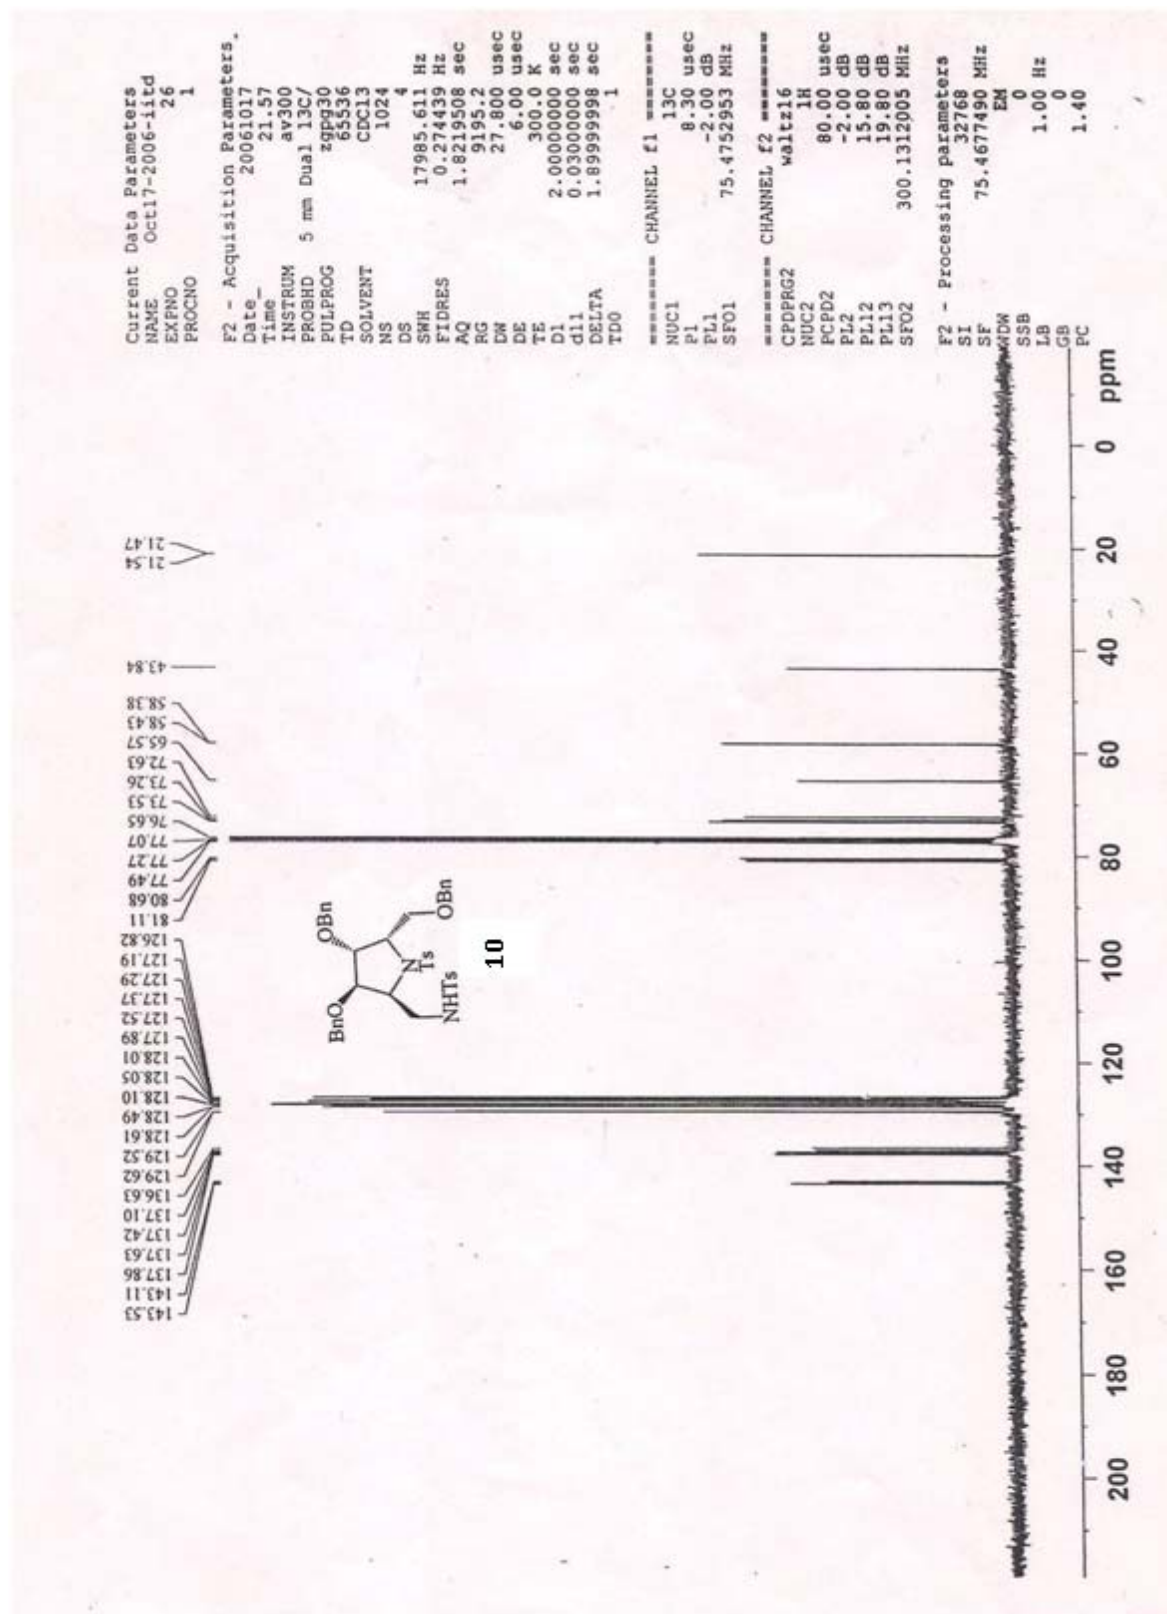

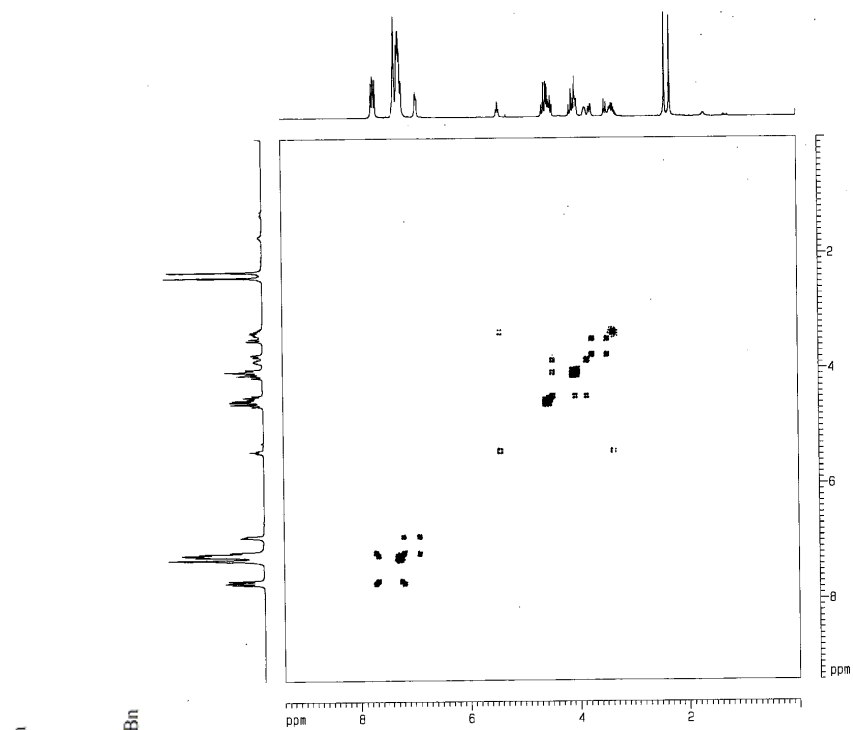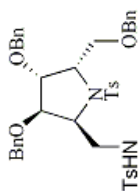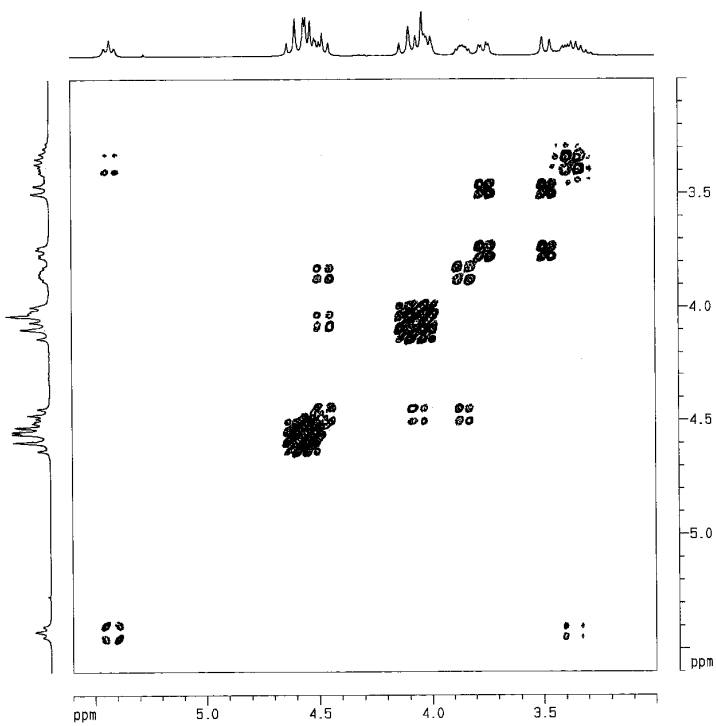

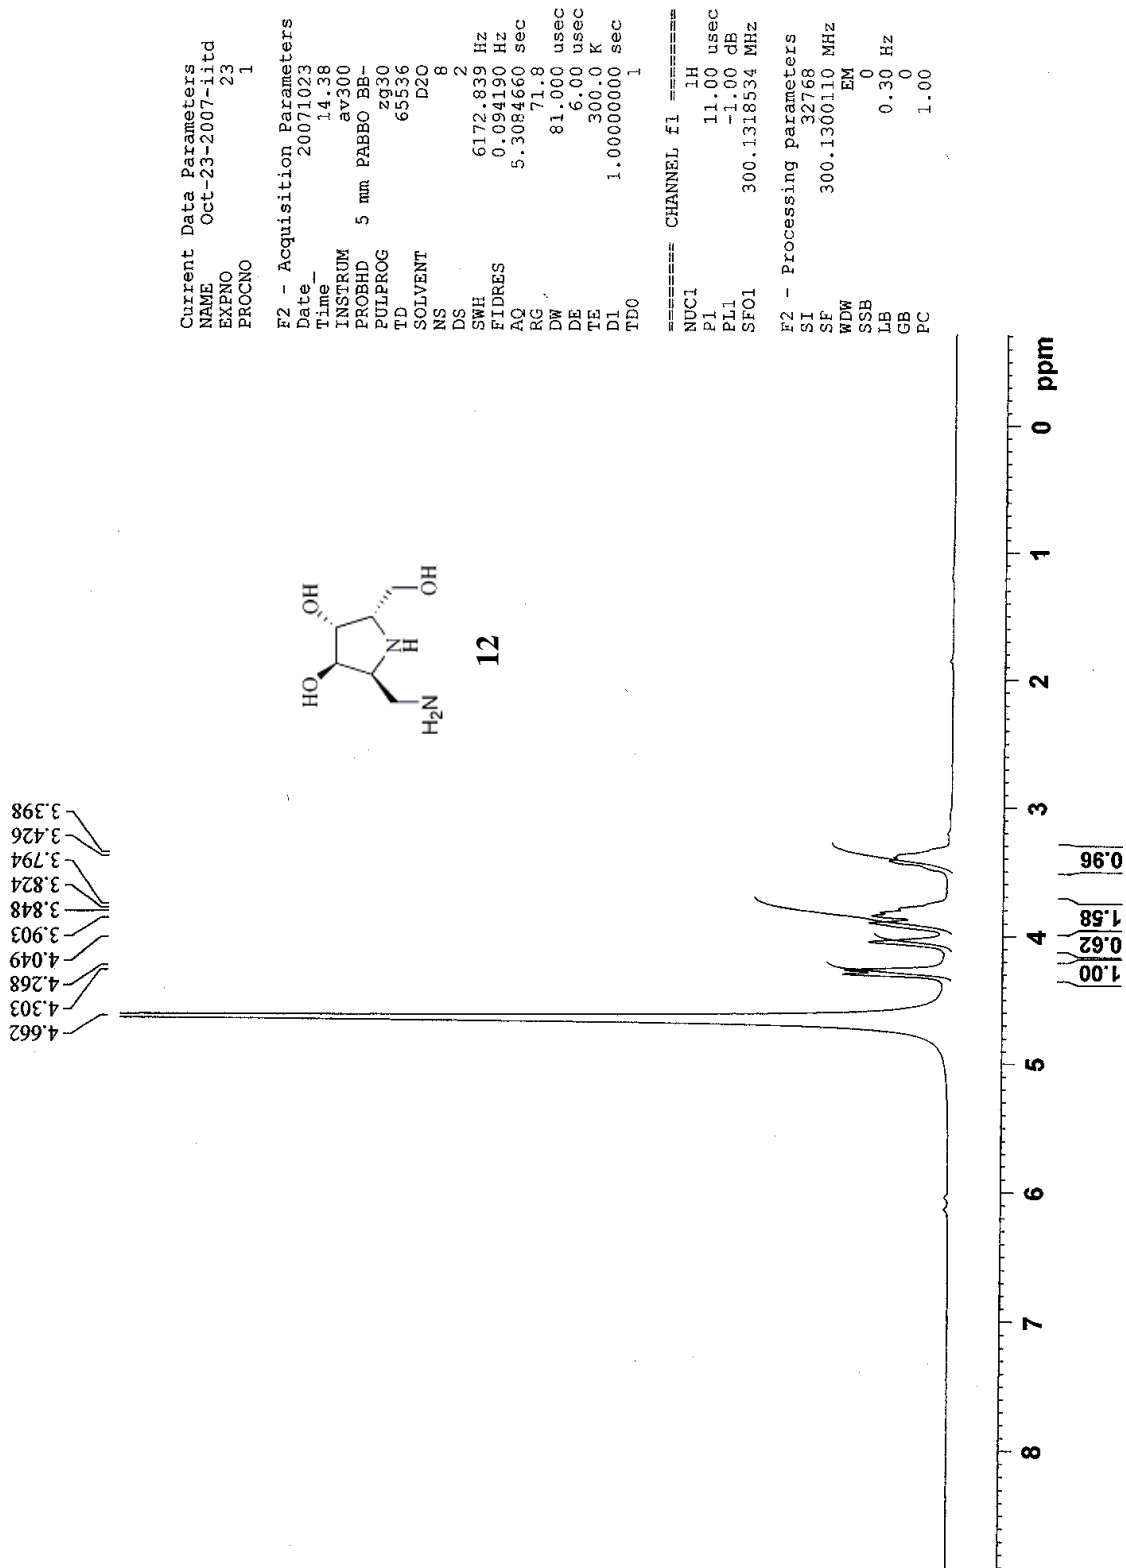

Current Data Parameters  
NAME Nov-12-2007-litd  
EXPNO 8  
PROCNO 1

F2 - Acquisition Parameters  
Date\_ 20071112  
Time\_ 13.05  
INSTRUM av300  
PROBHD 5 mm PABEO BB-  
PULPROG zgpg30  
TD 65536  
SOLVENT D2O  
NS 1476  
DS 4  
SWH 17985.611 Hz  
FIDRES 0.274439 Hz  
AQ 1.8219508 sec  
RG 32768  
DW 27.800 usec  
DE 6.00 usec  
TE 300.0 K  
D1 2.00000000 sec  
d11 0.03000000 sec  
DELTA 1.89999998 sec  
TDO 1

==== CHANNEL f1 =====  
NUC1 13C  
P1 8.00 usec  
PL1 -3.00 dB  
SFO1 75.4752953 MHz

==== CHANNEL f2 =====  
CPDPRG2 waltz16  
NUC2 1H  
PCPD2 80.00 usec  
PL2 -1.00 dB  
PL12 16.23 dB  
PL13 20.23 dB  
SFO2 300.1312005 MHz

F2 - Processing parameters  
SI 32768  
SF 75.4677490 MHz  
WDW EM  
SSB 0  
LB 1.00 Hz  
GB 0  
PC 1.40

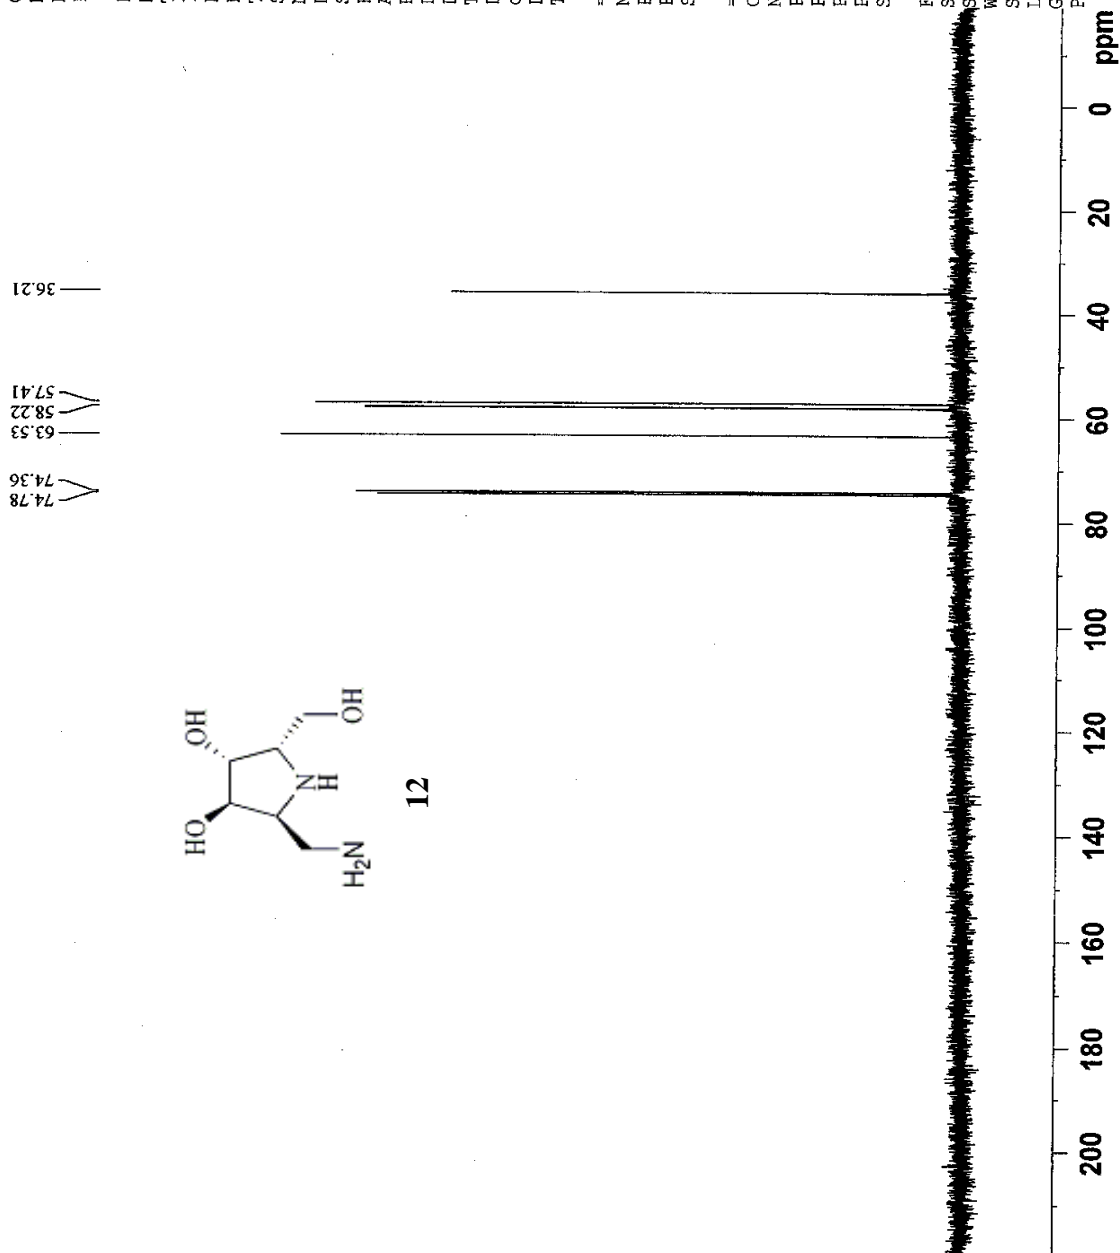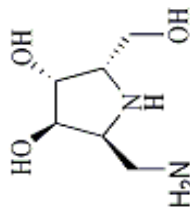

12

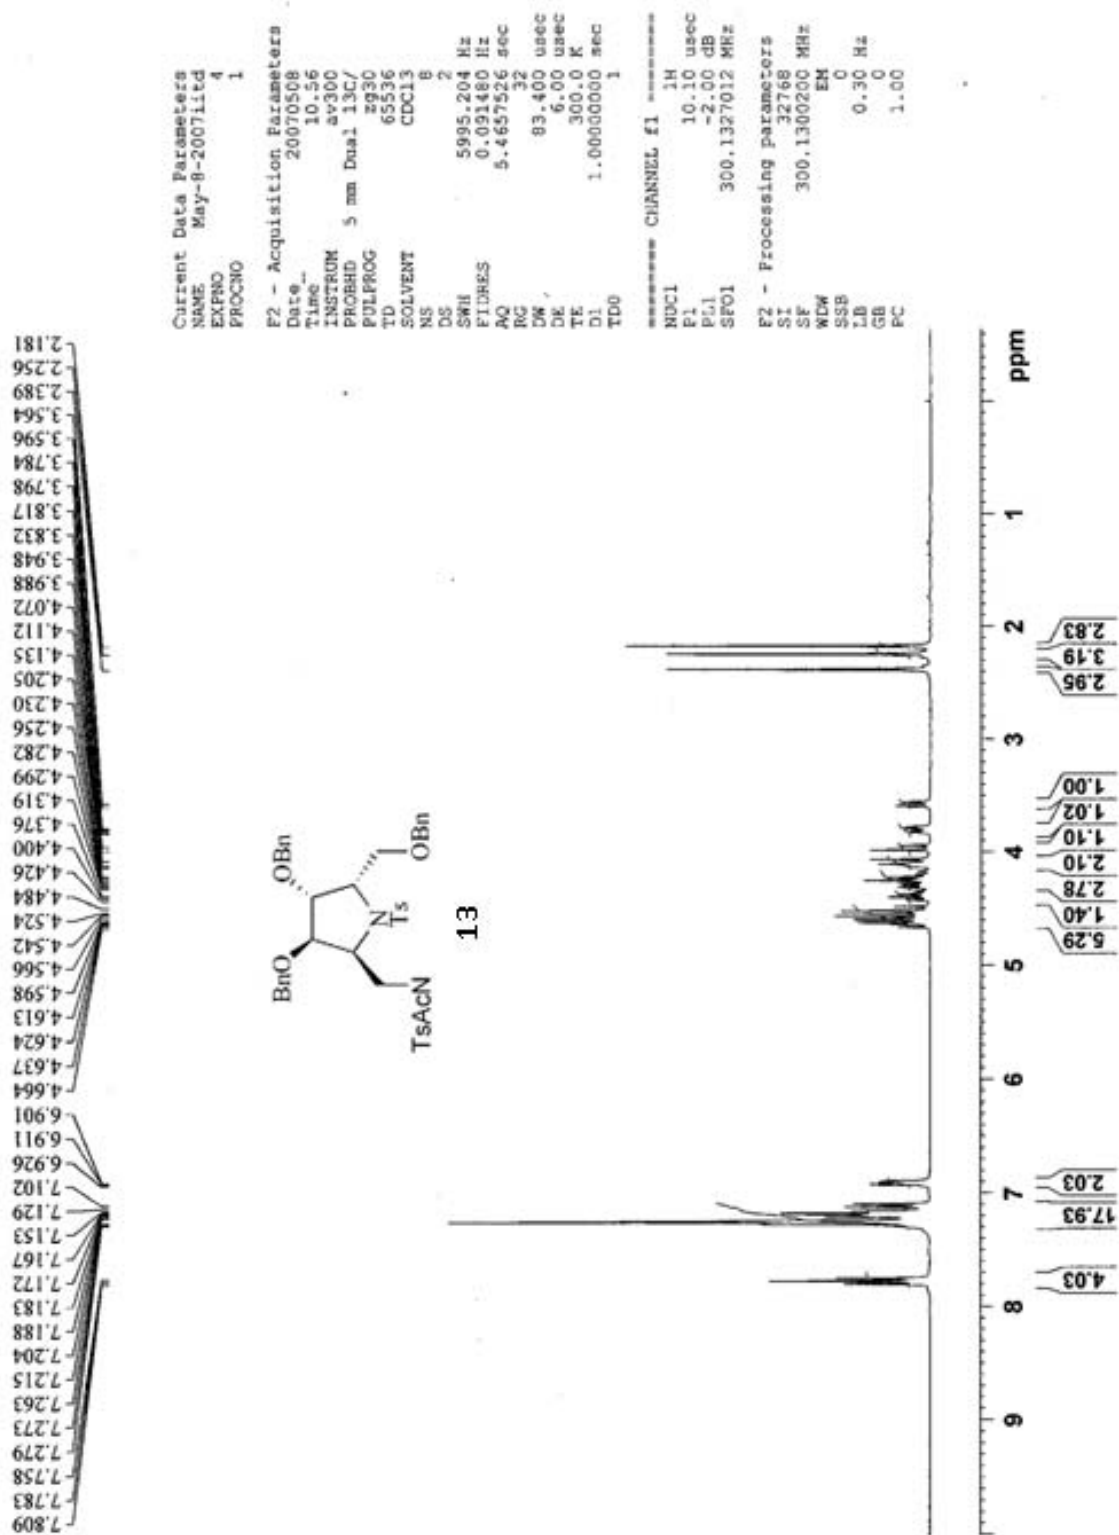

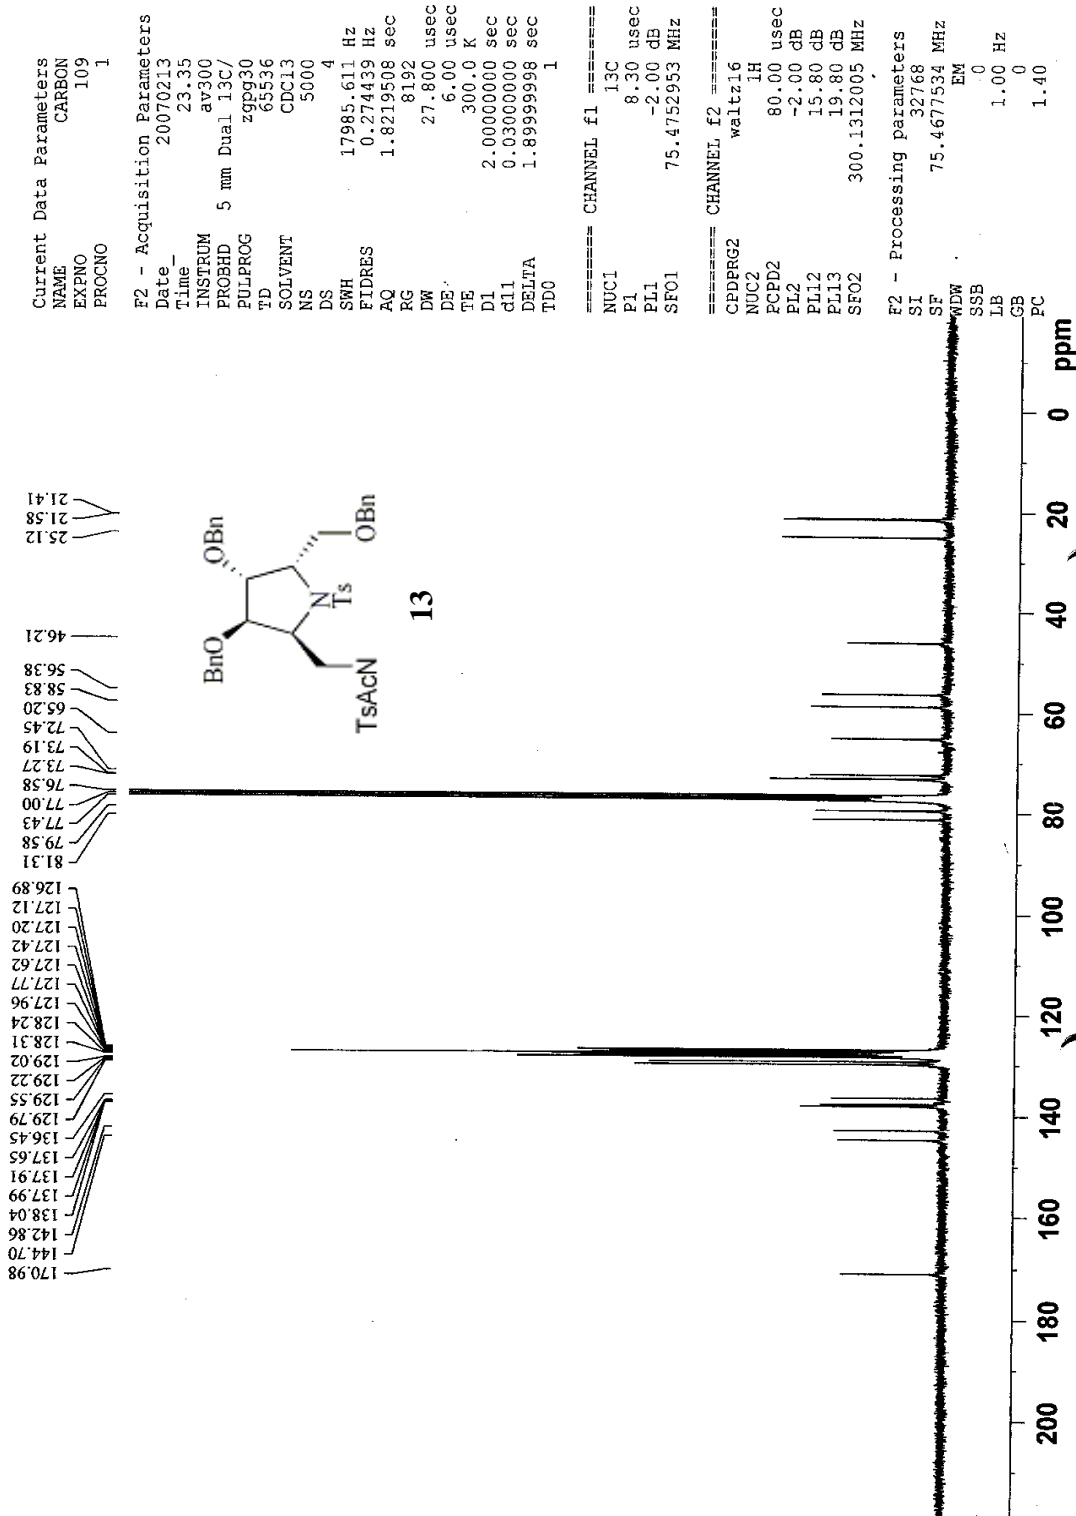

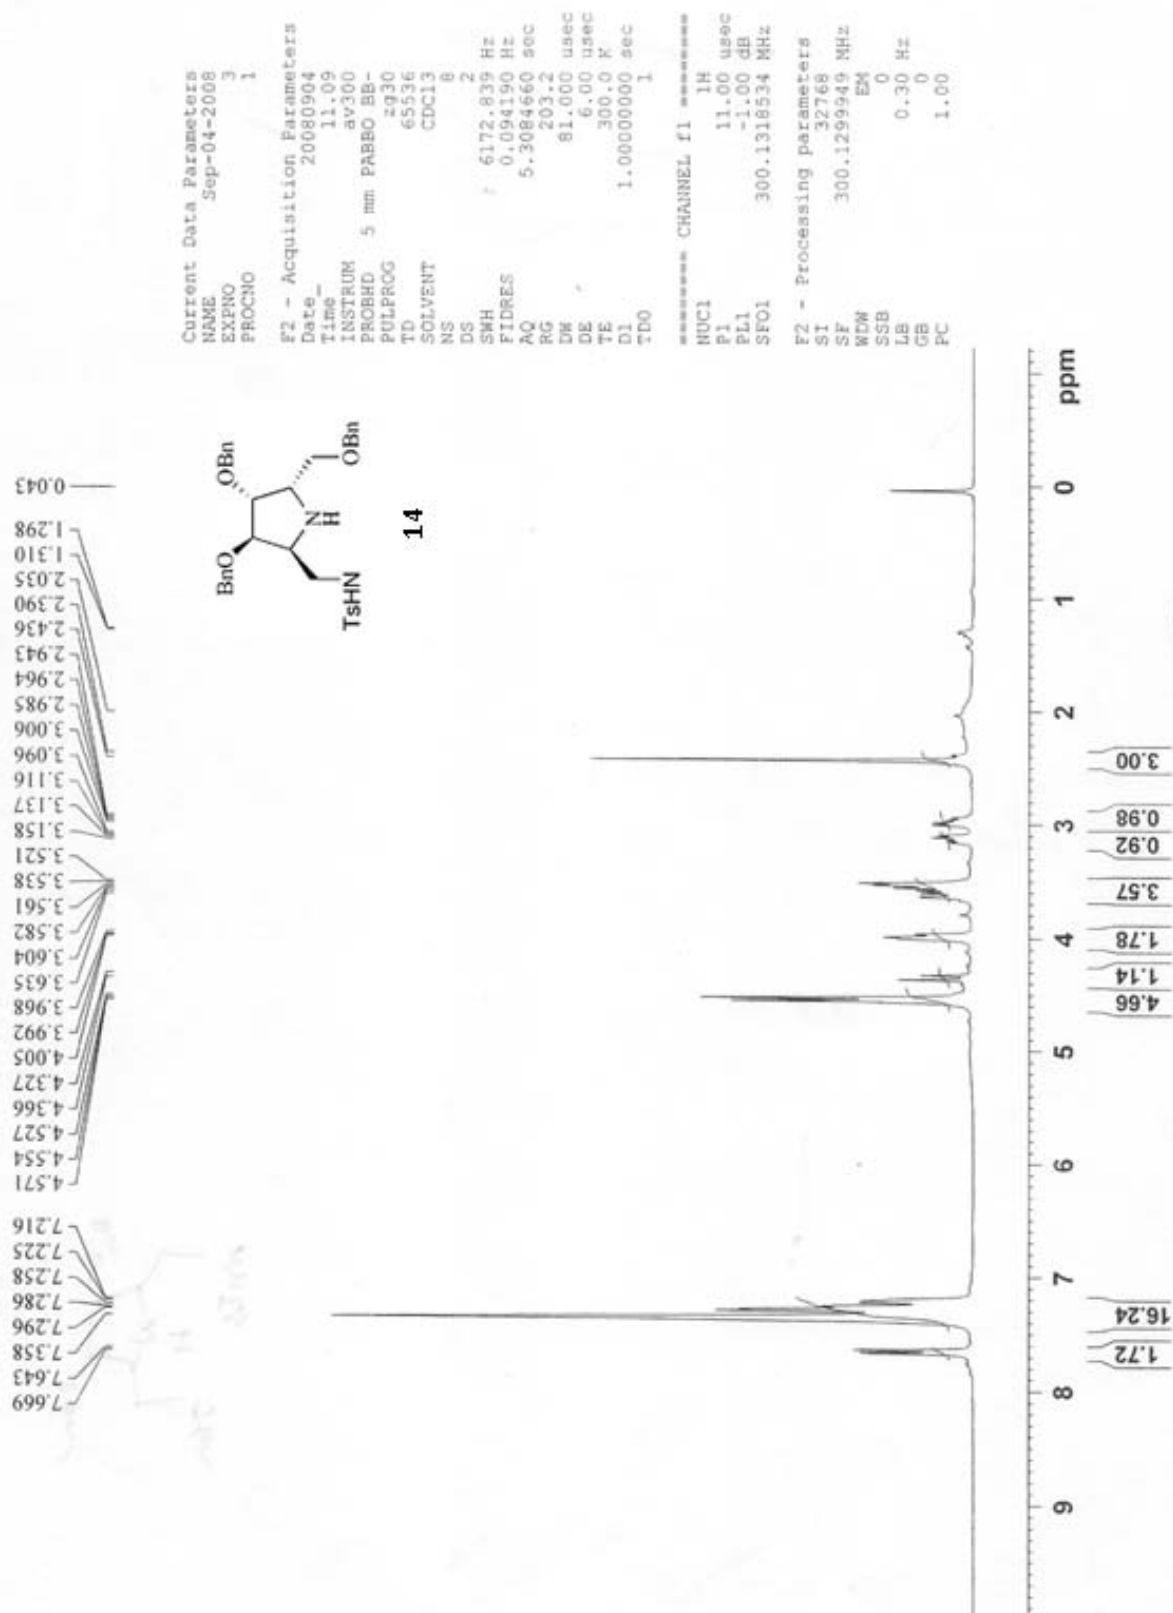

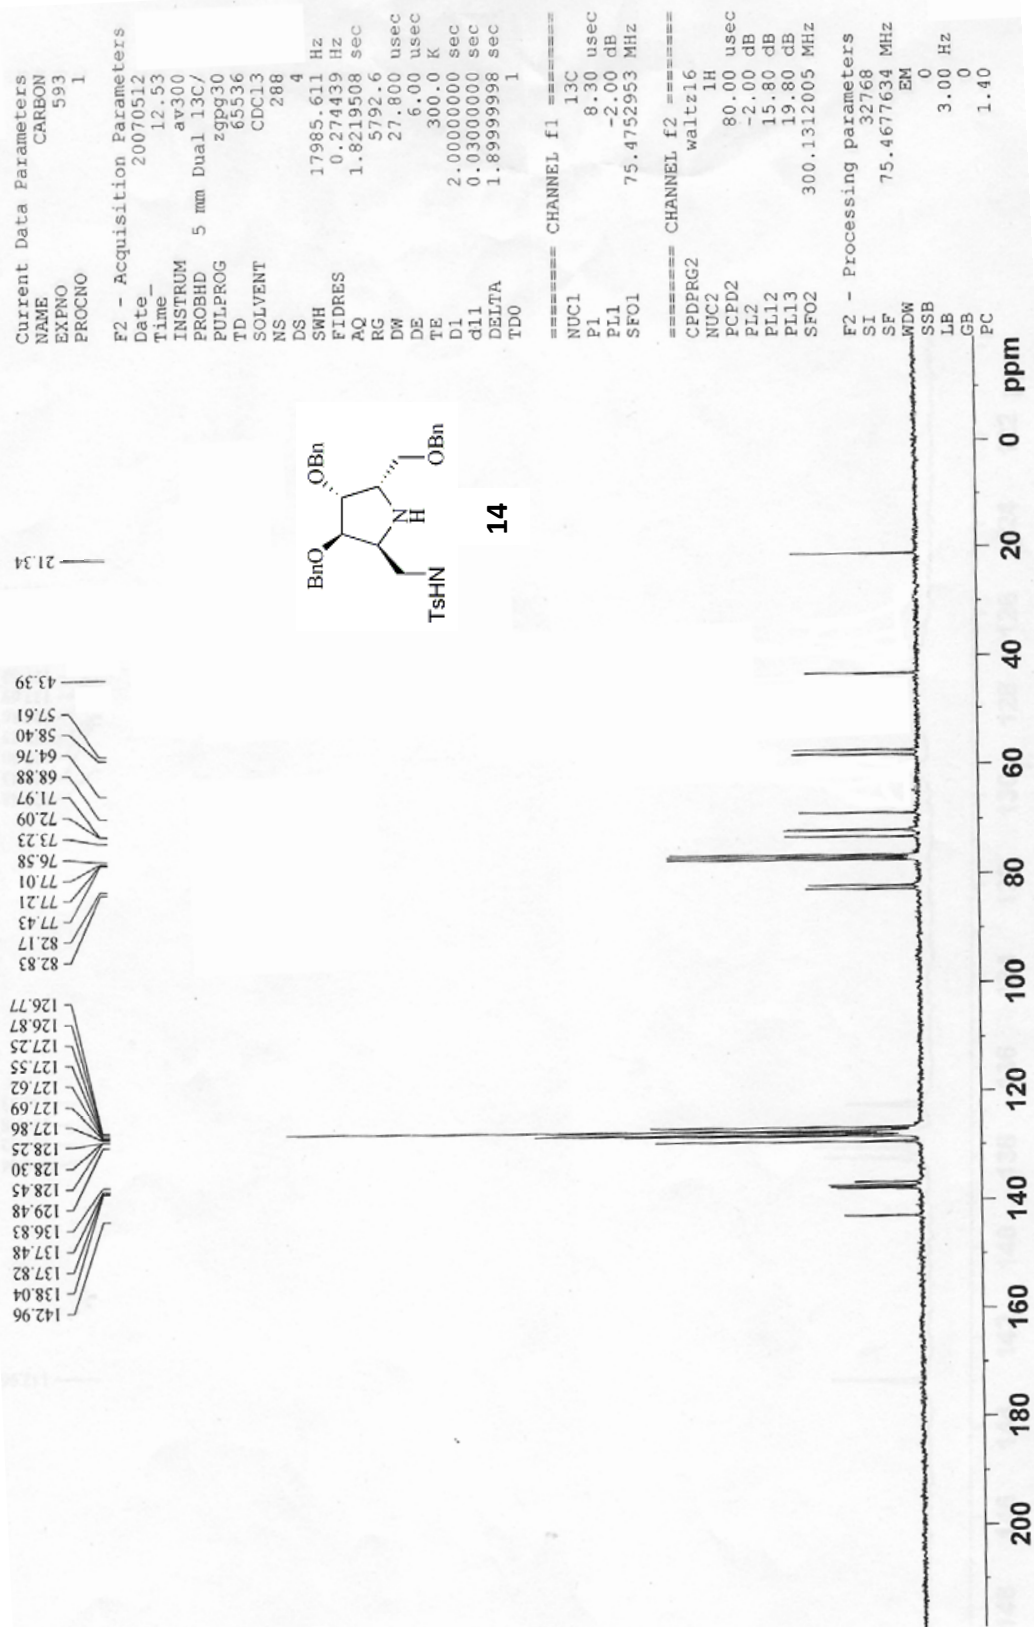



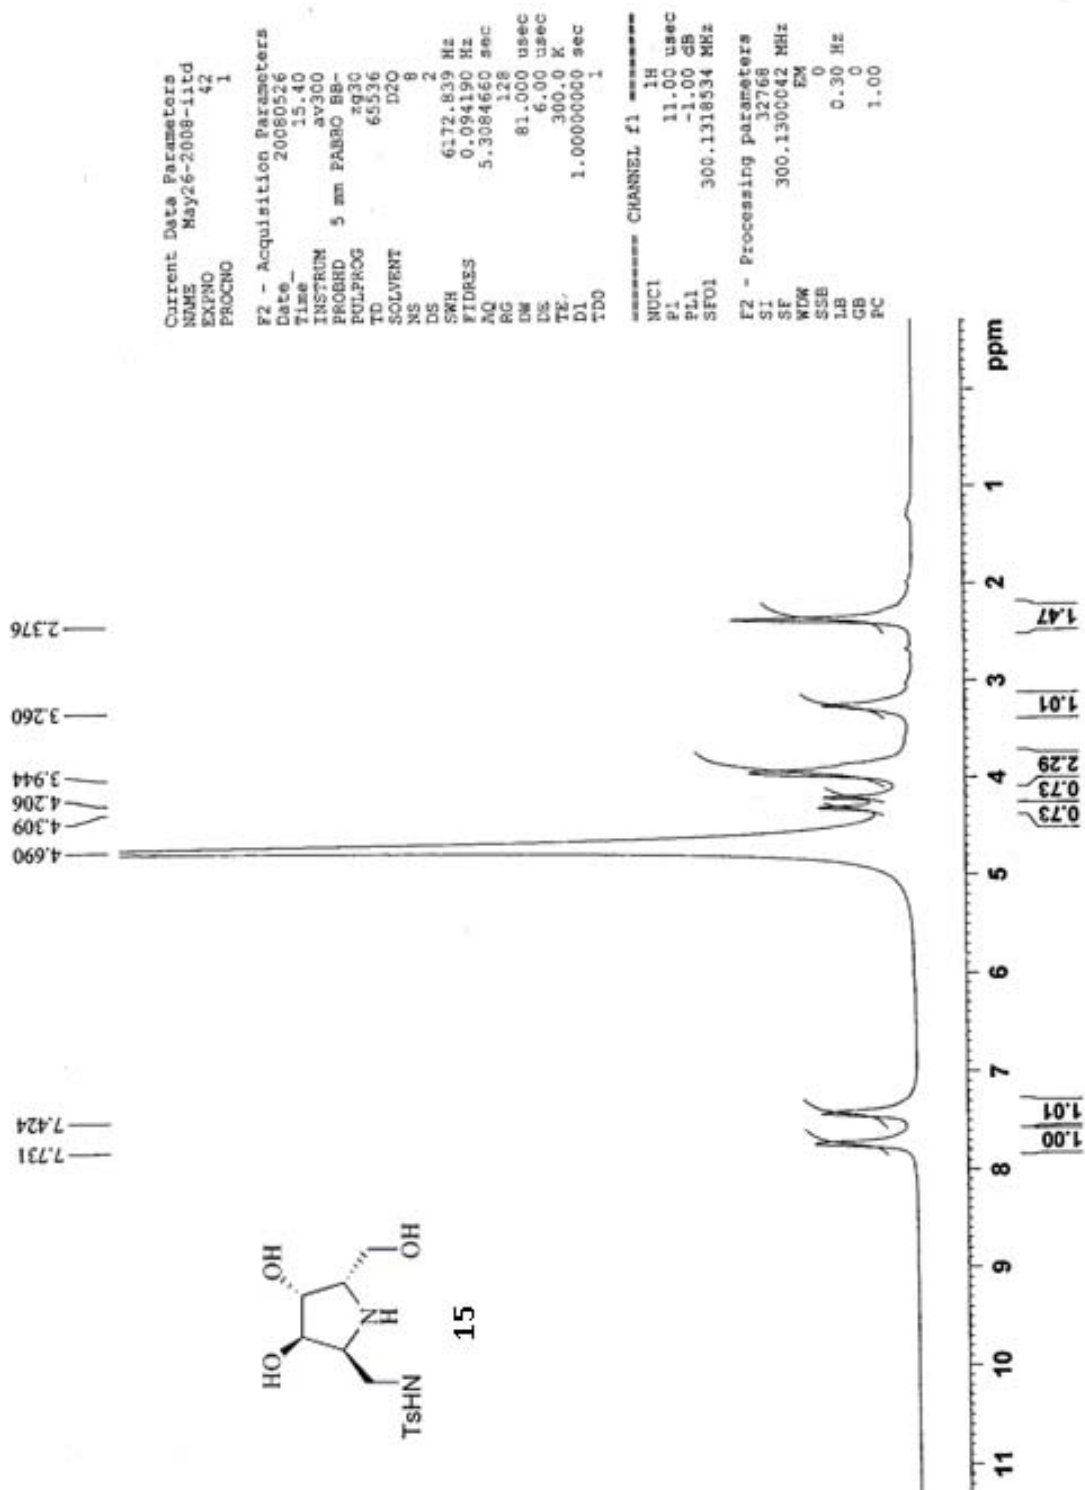

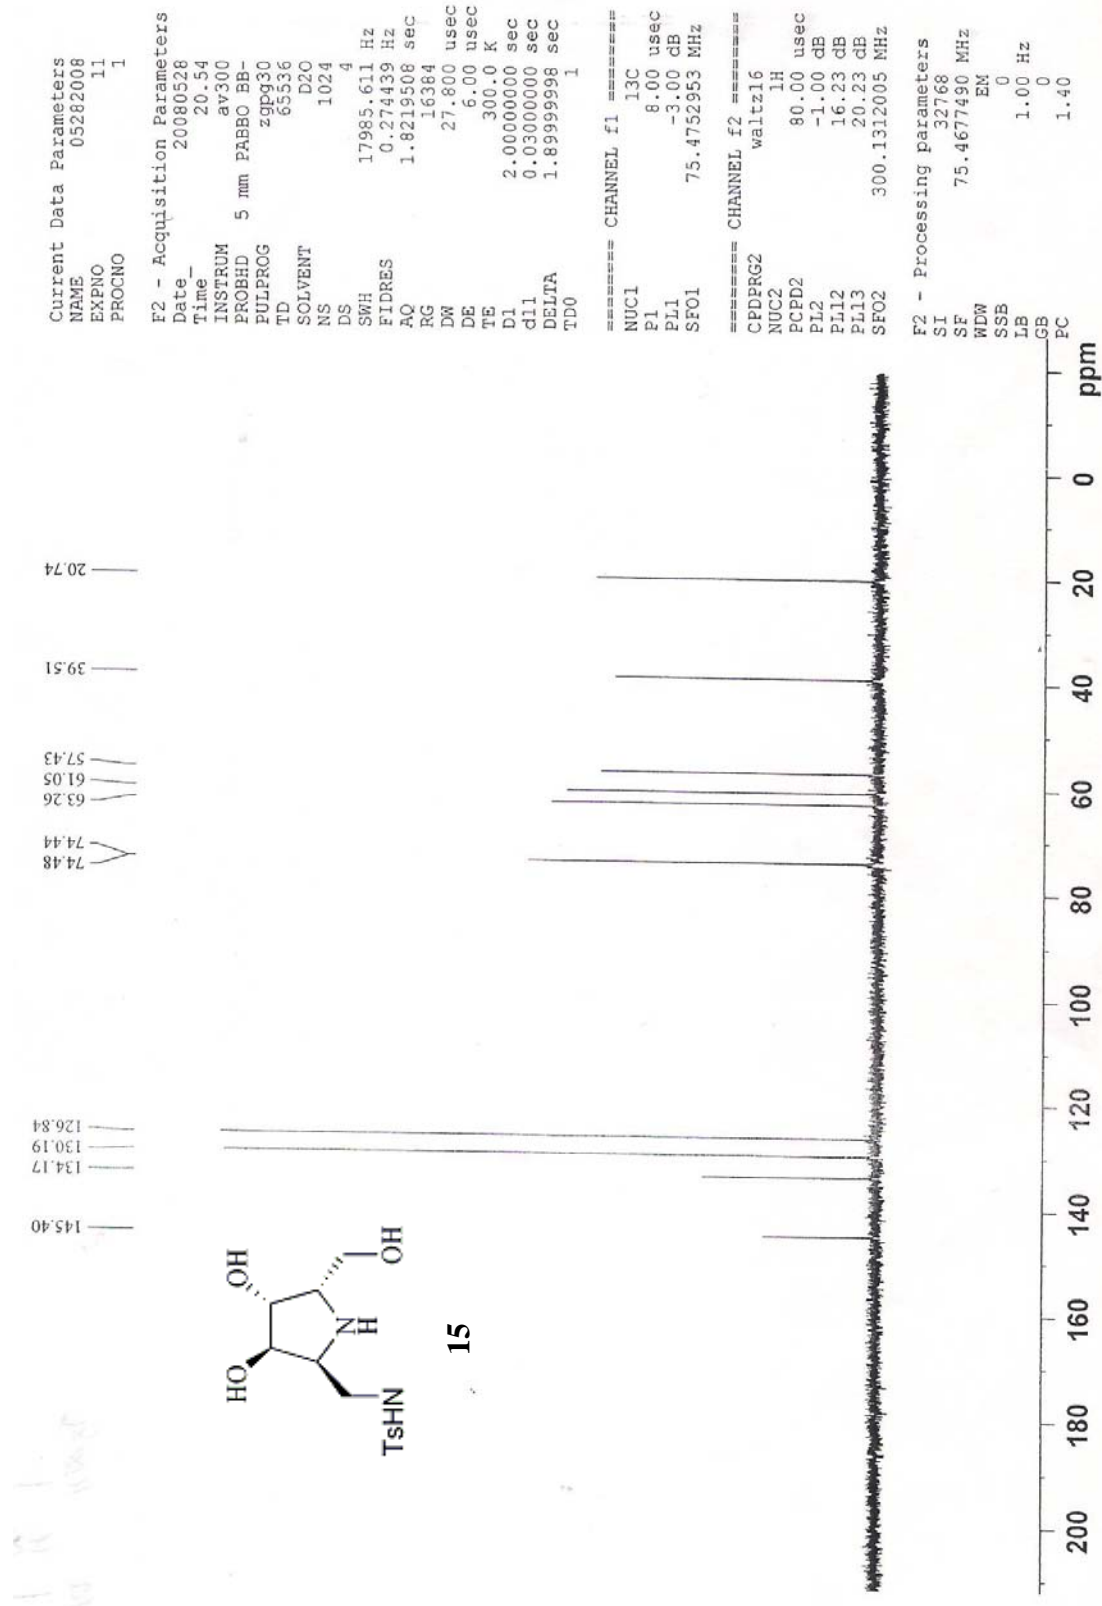

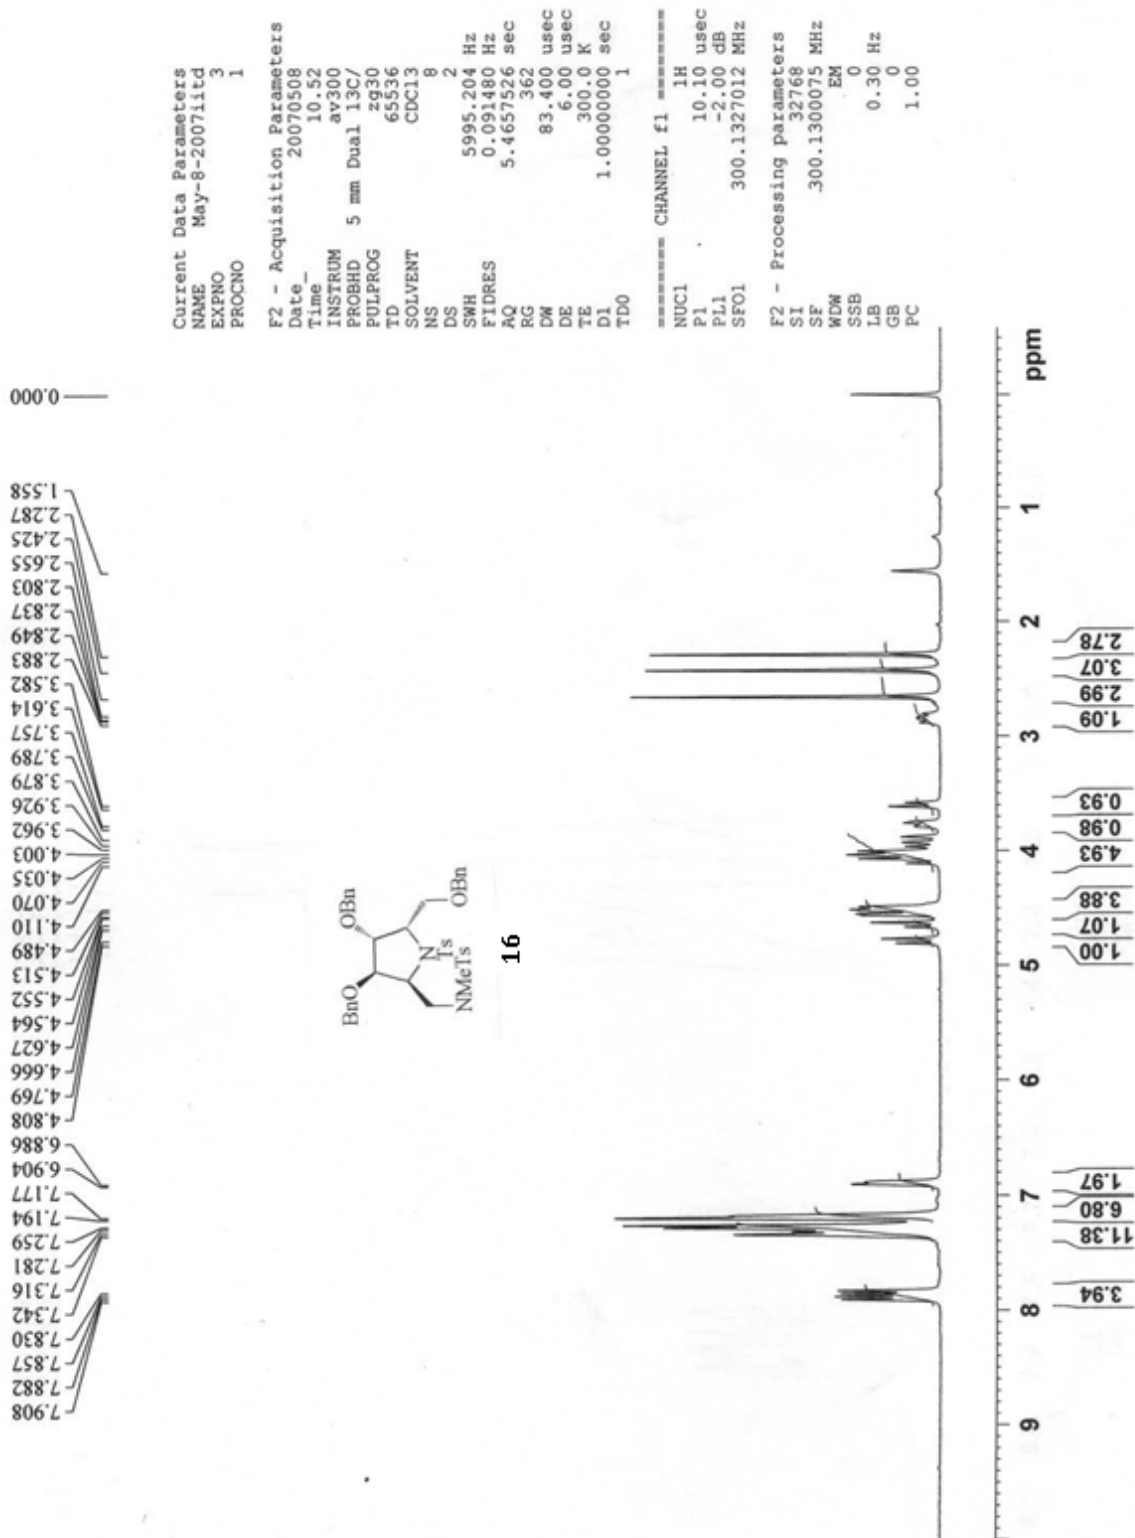

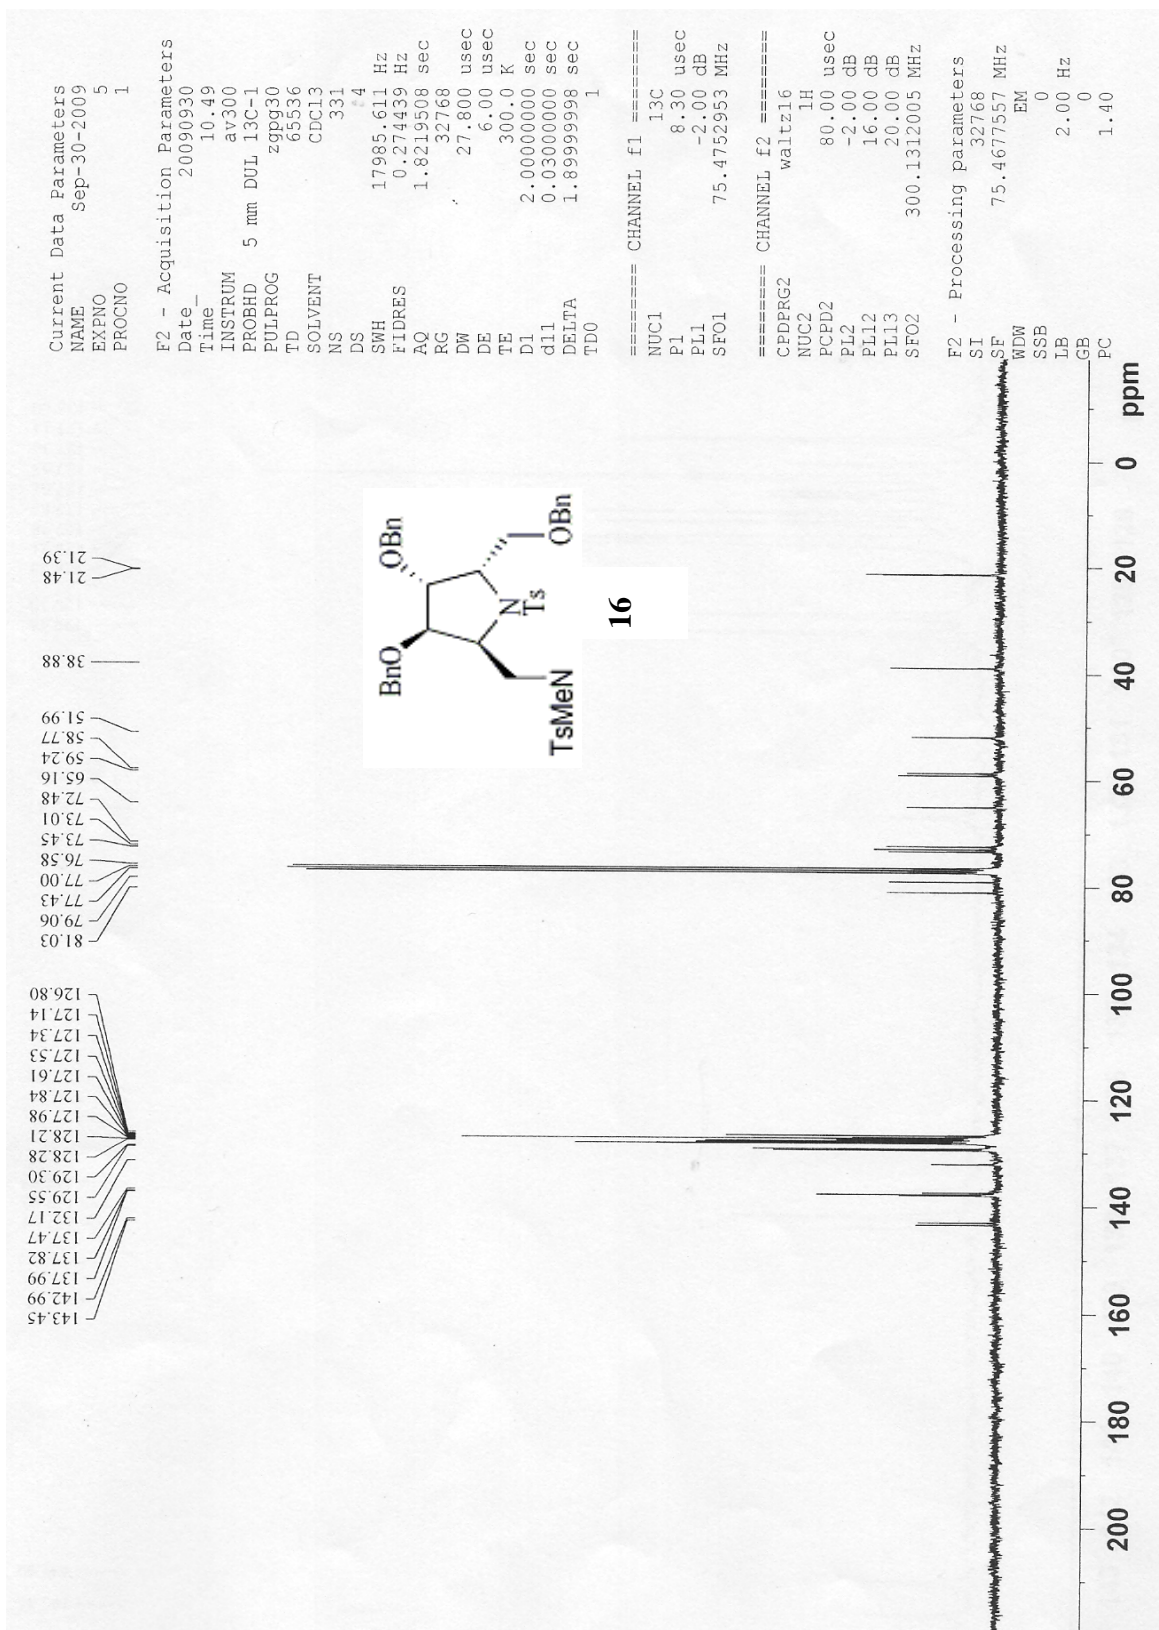

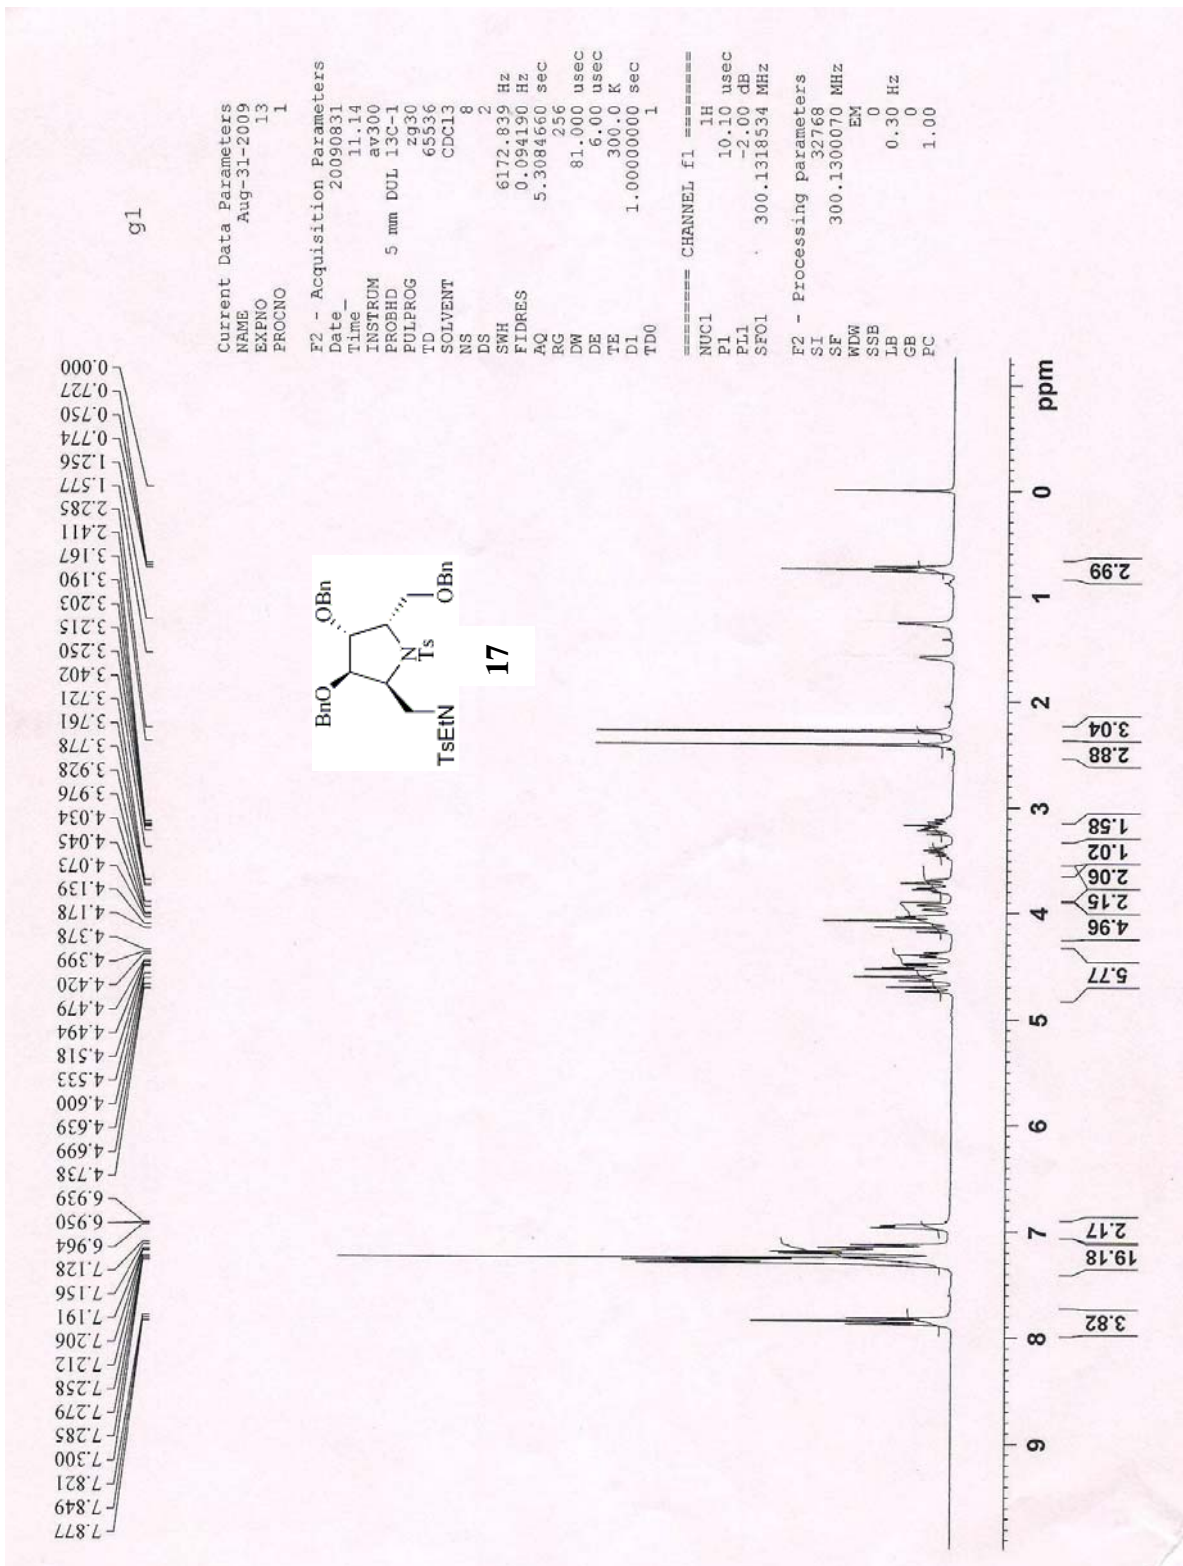



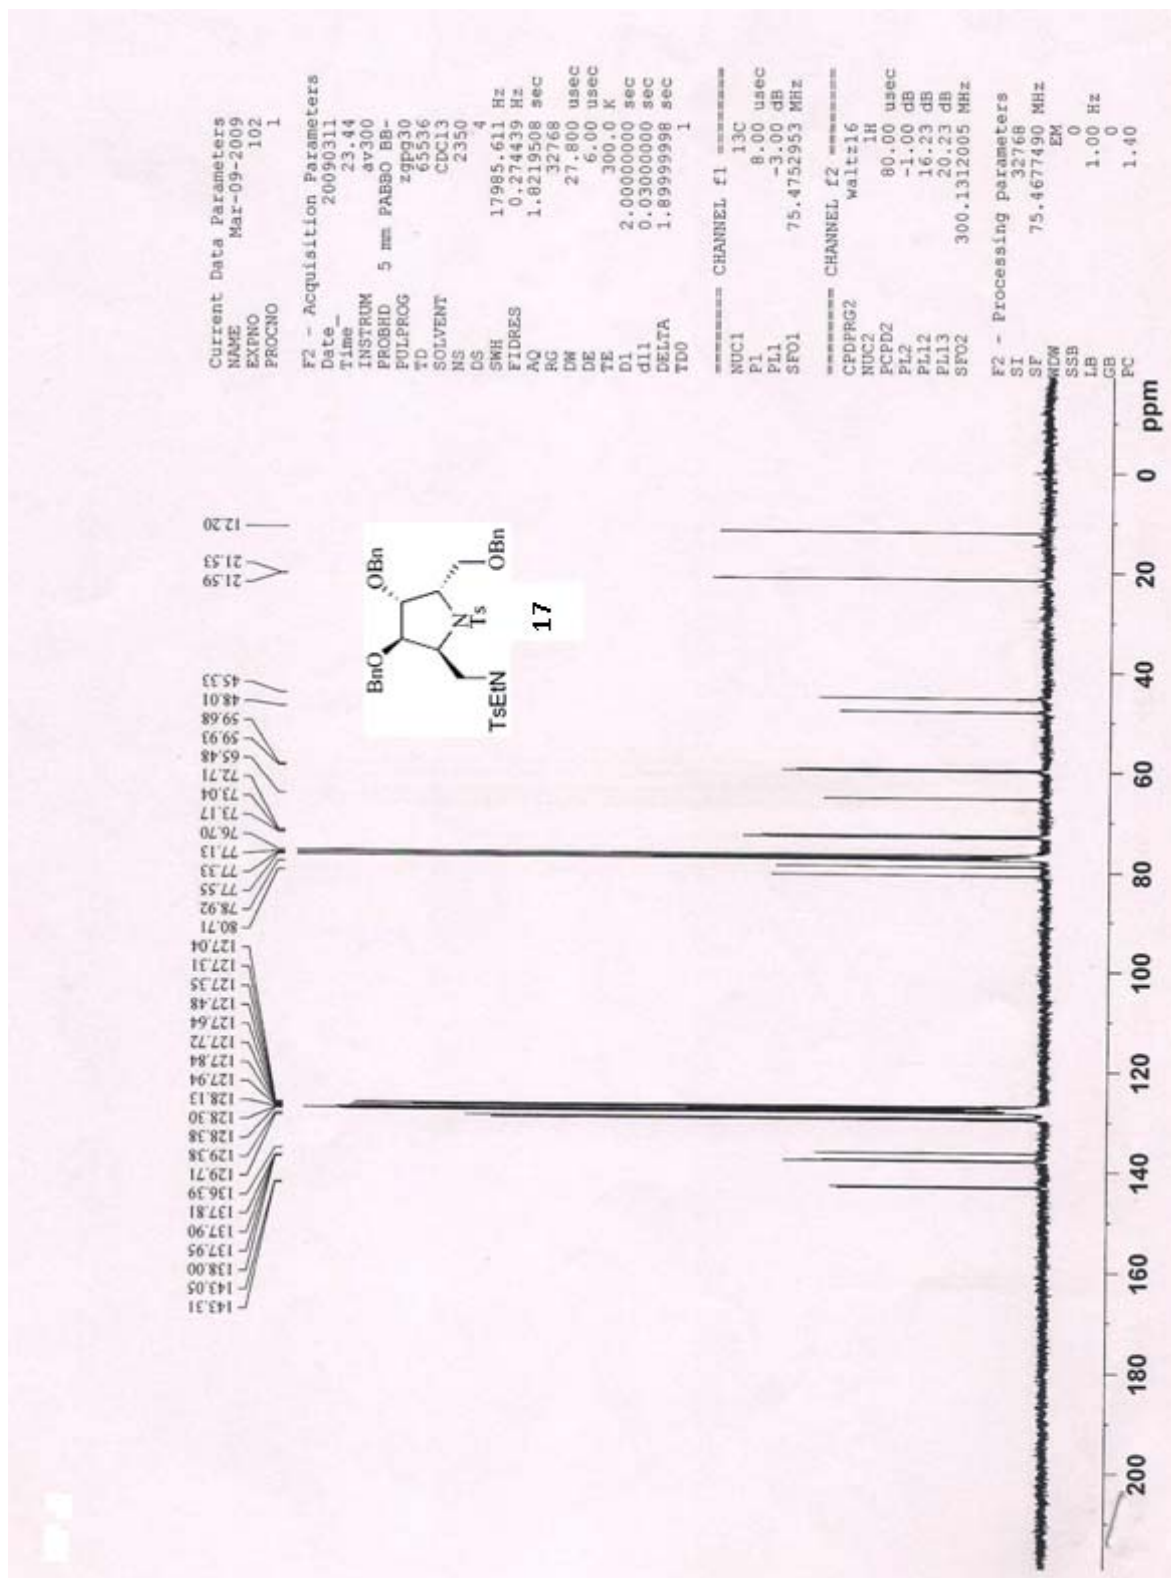

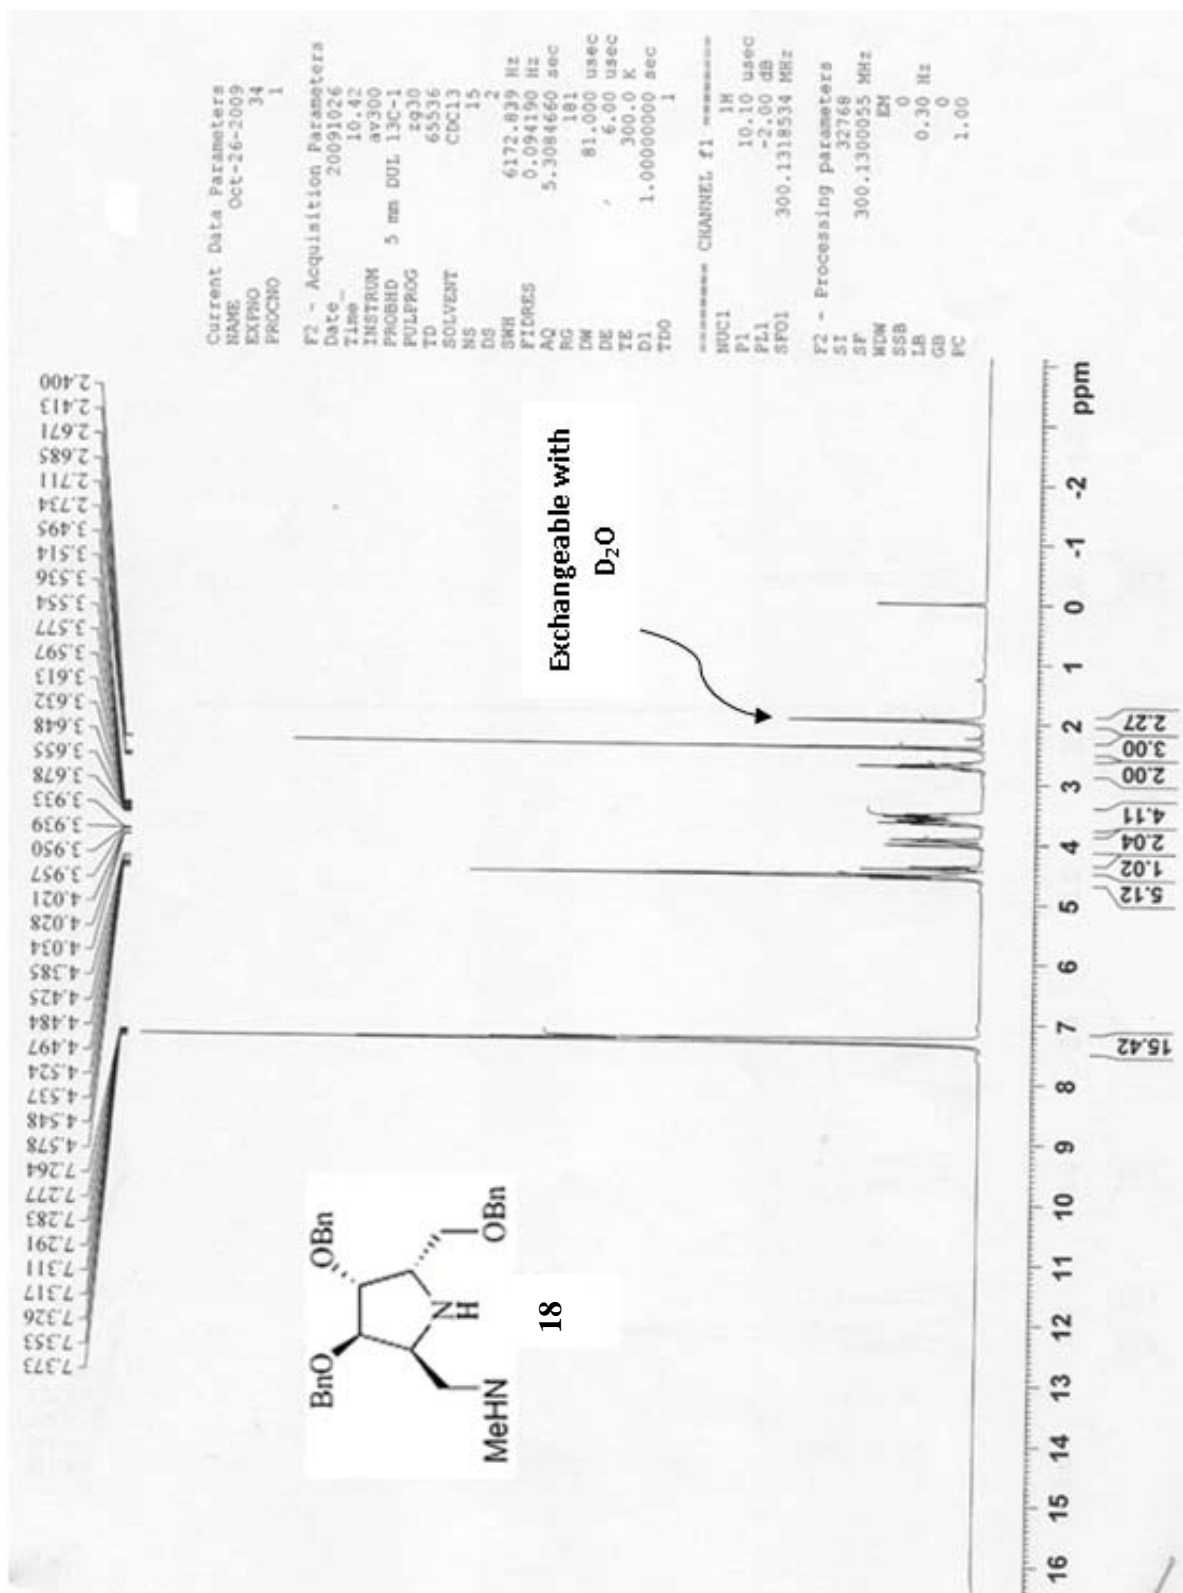

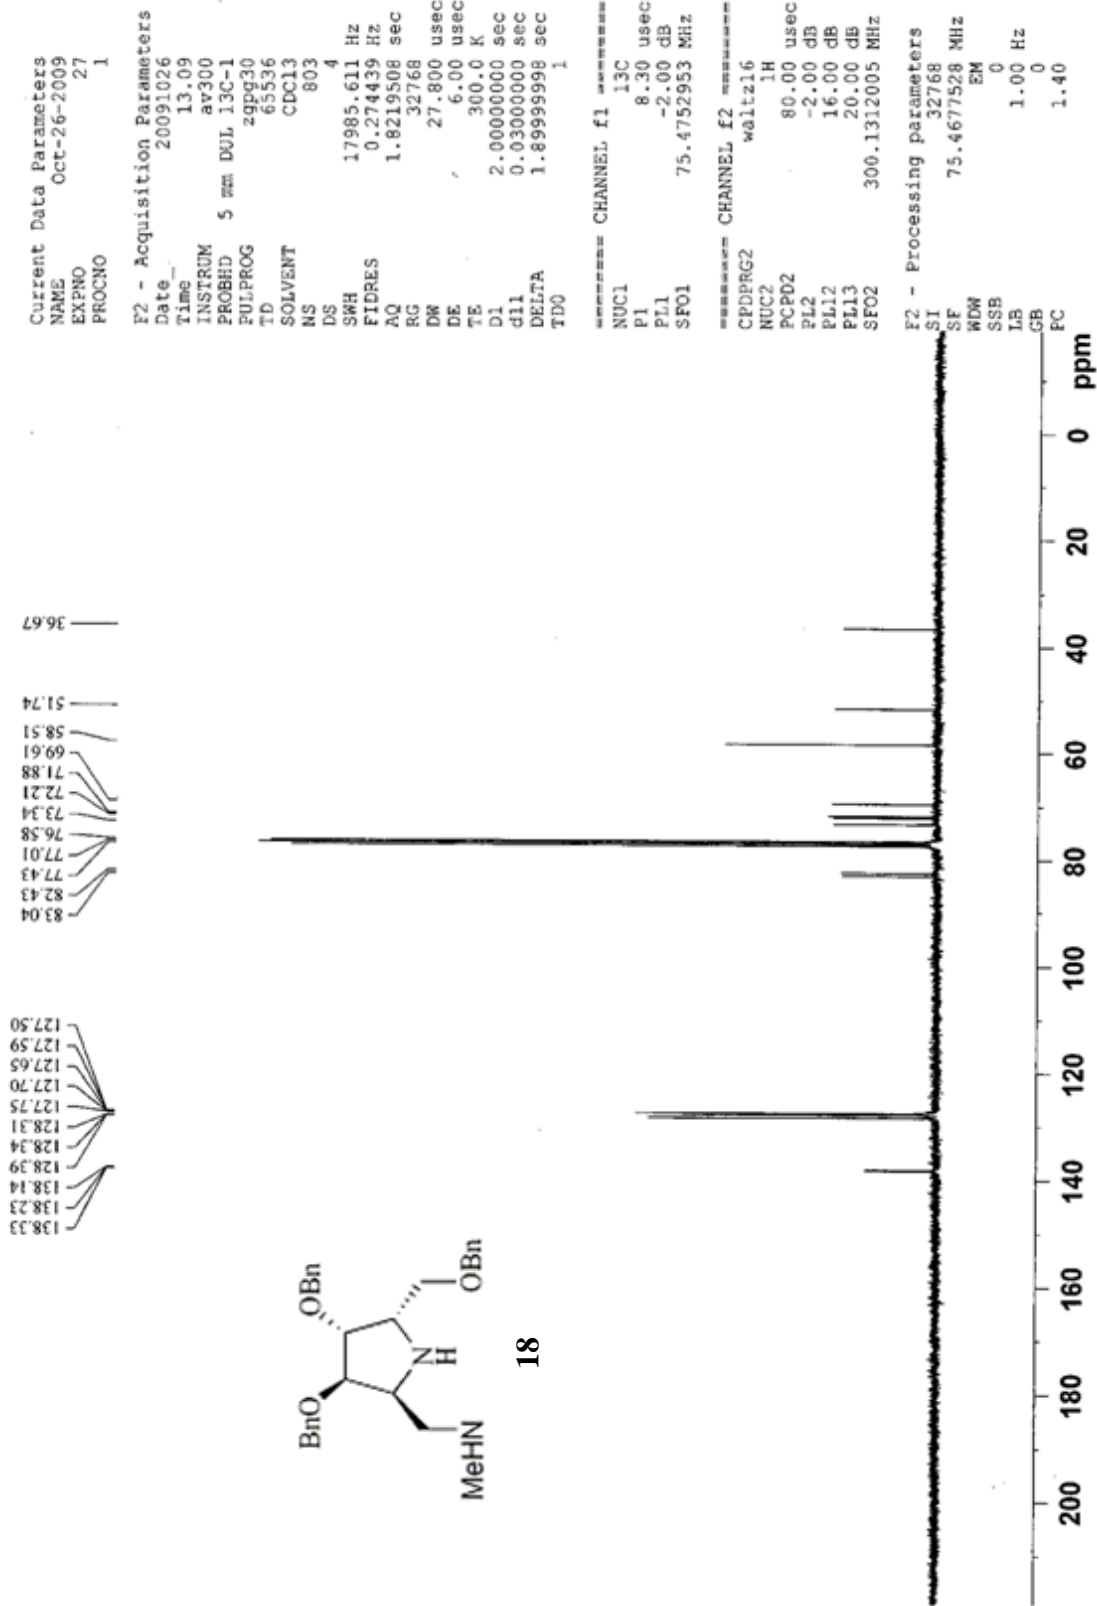



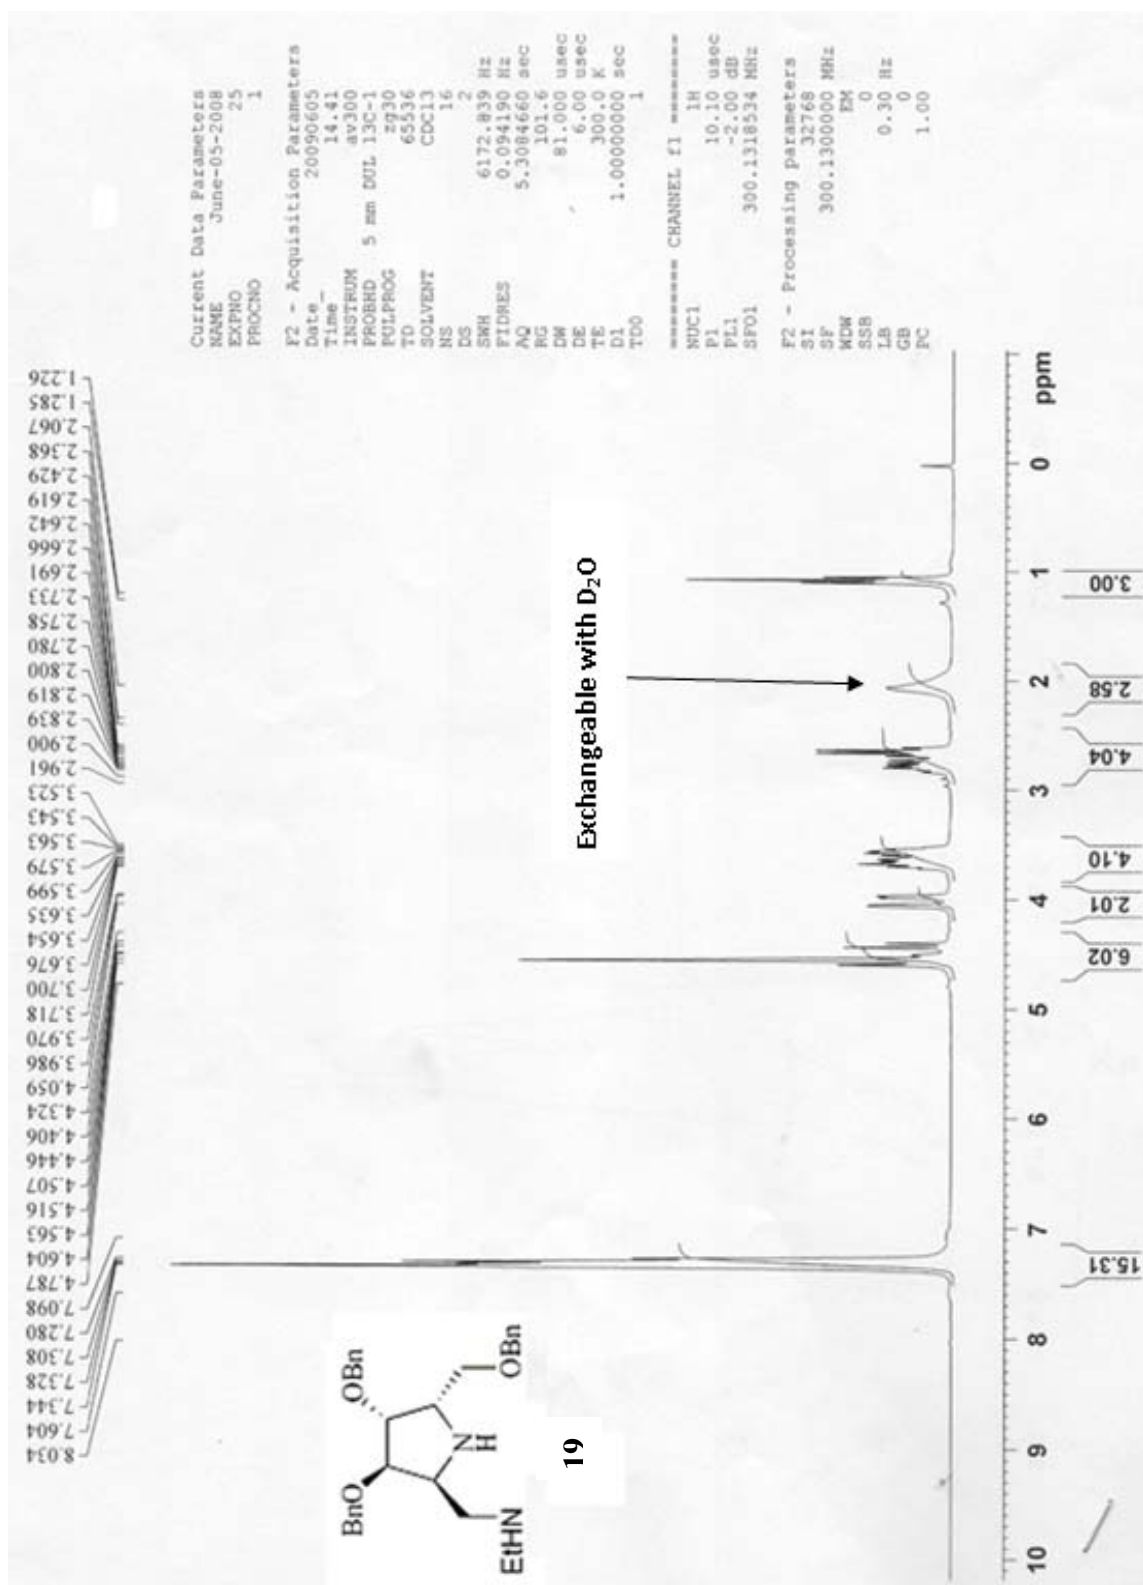

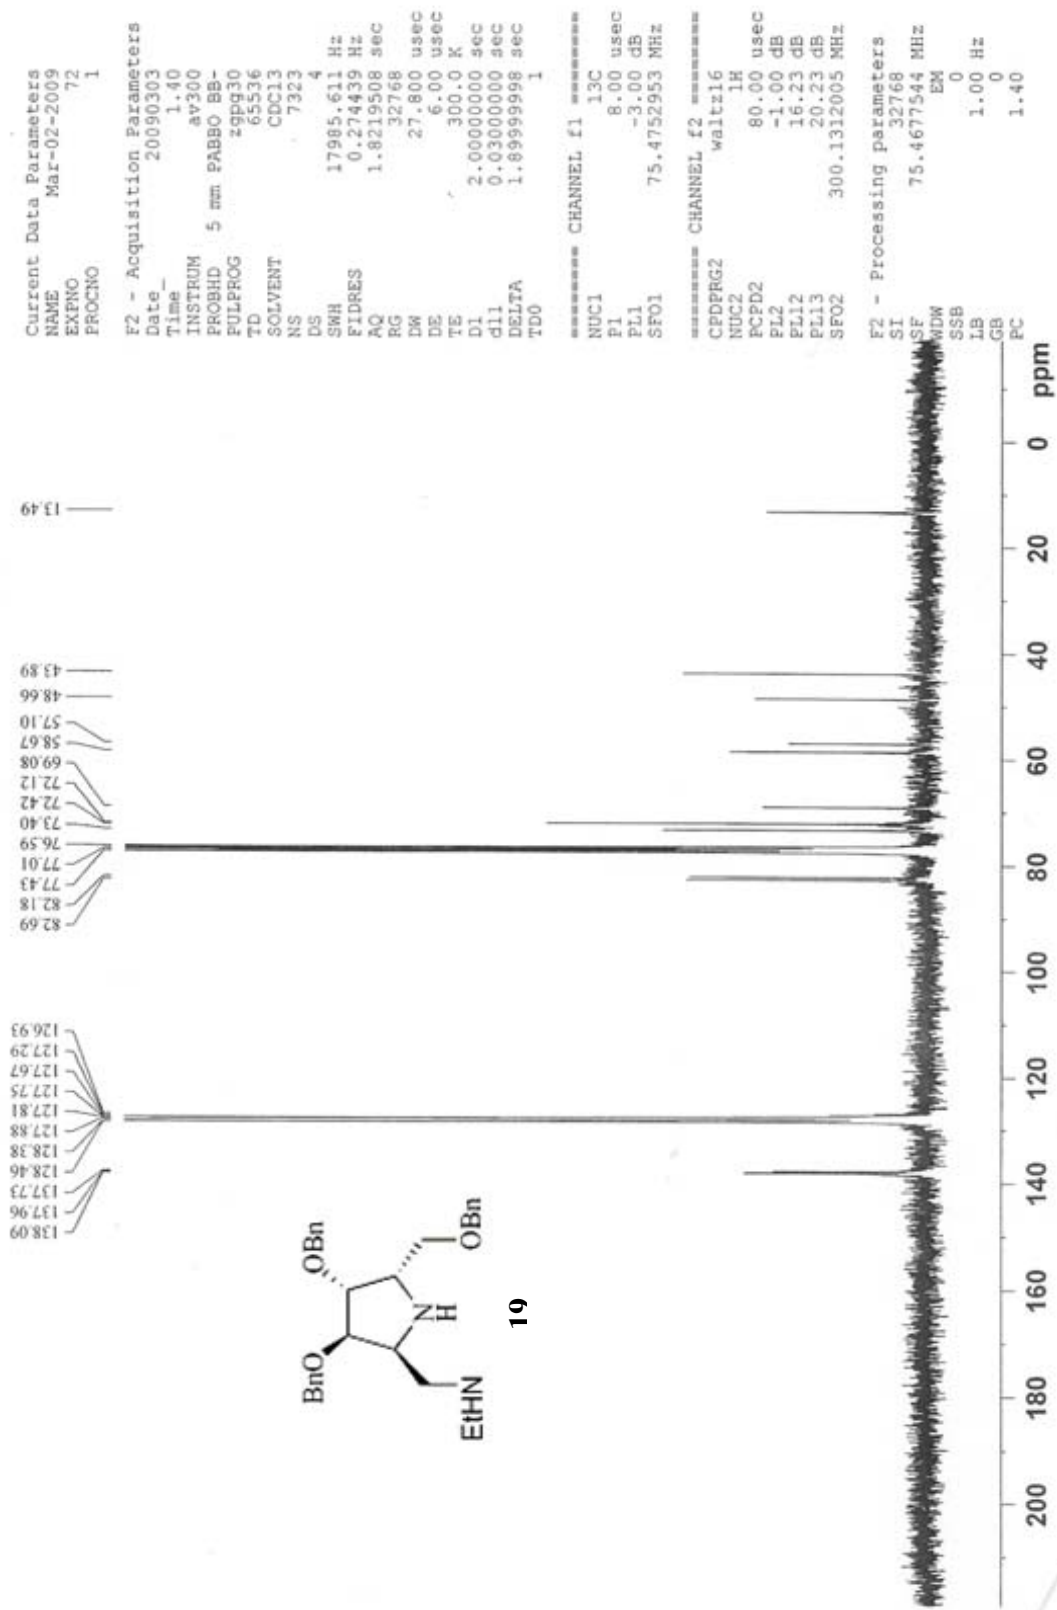

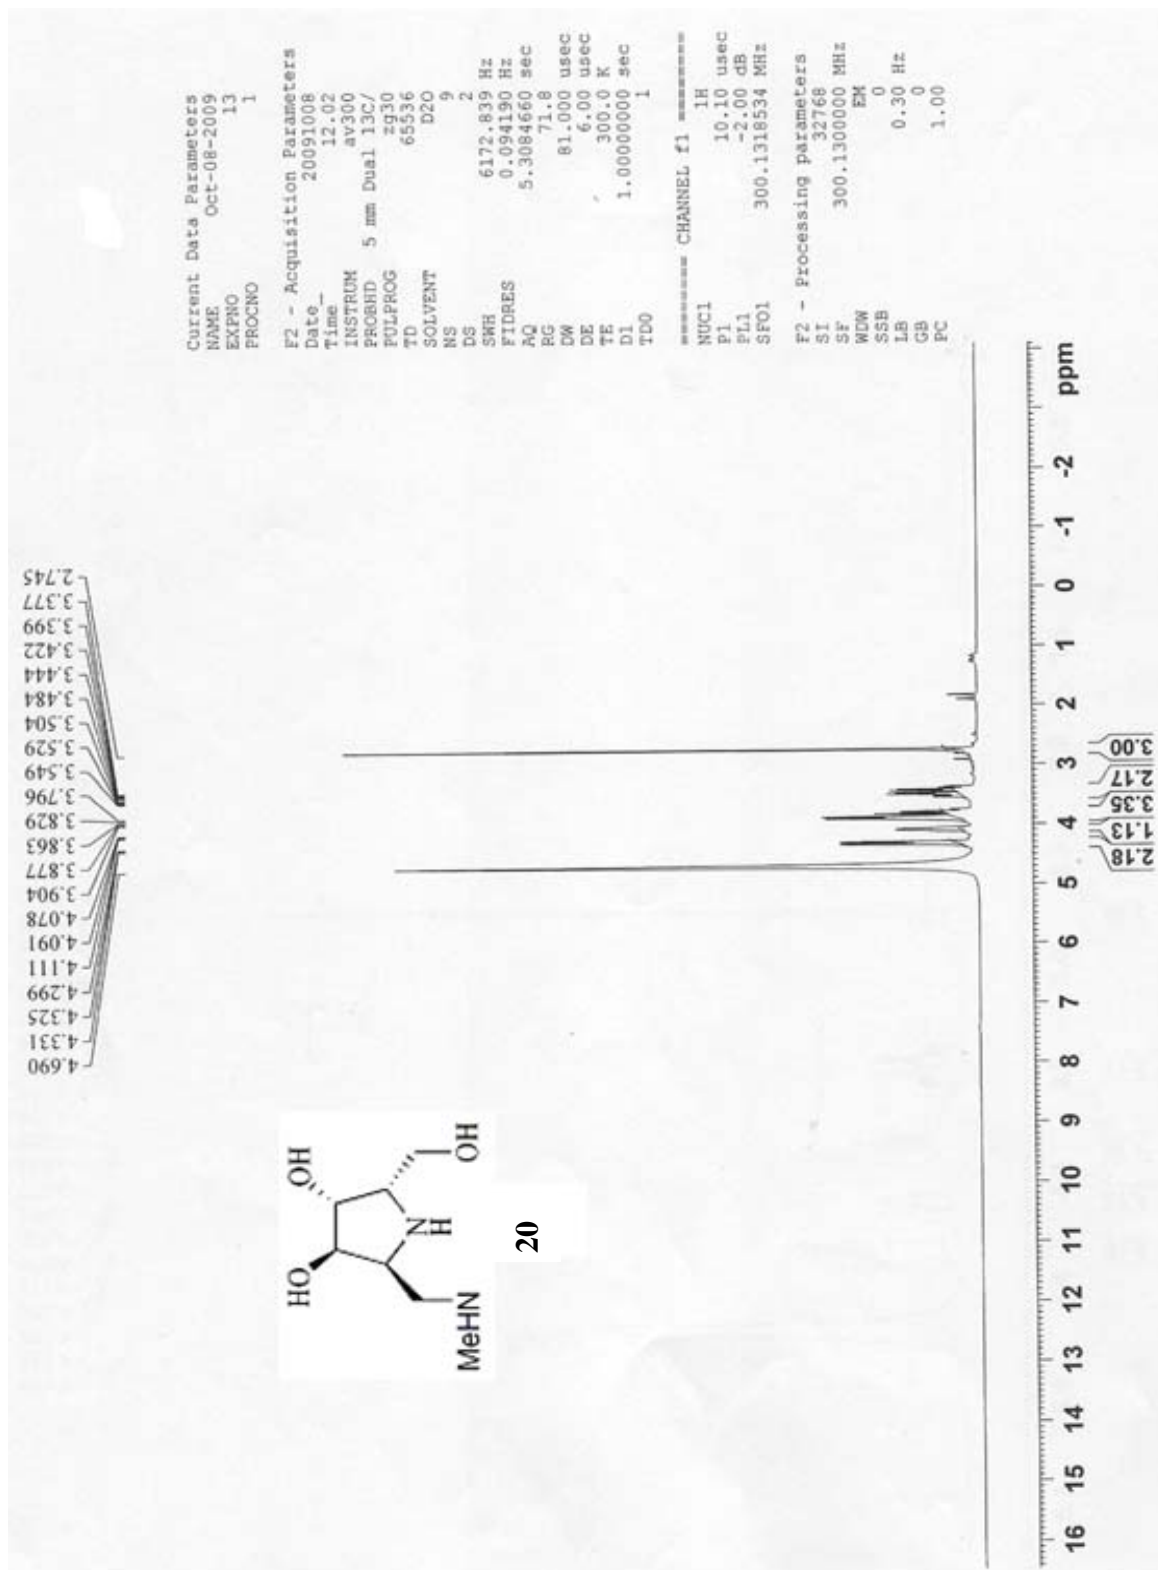

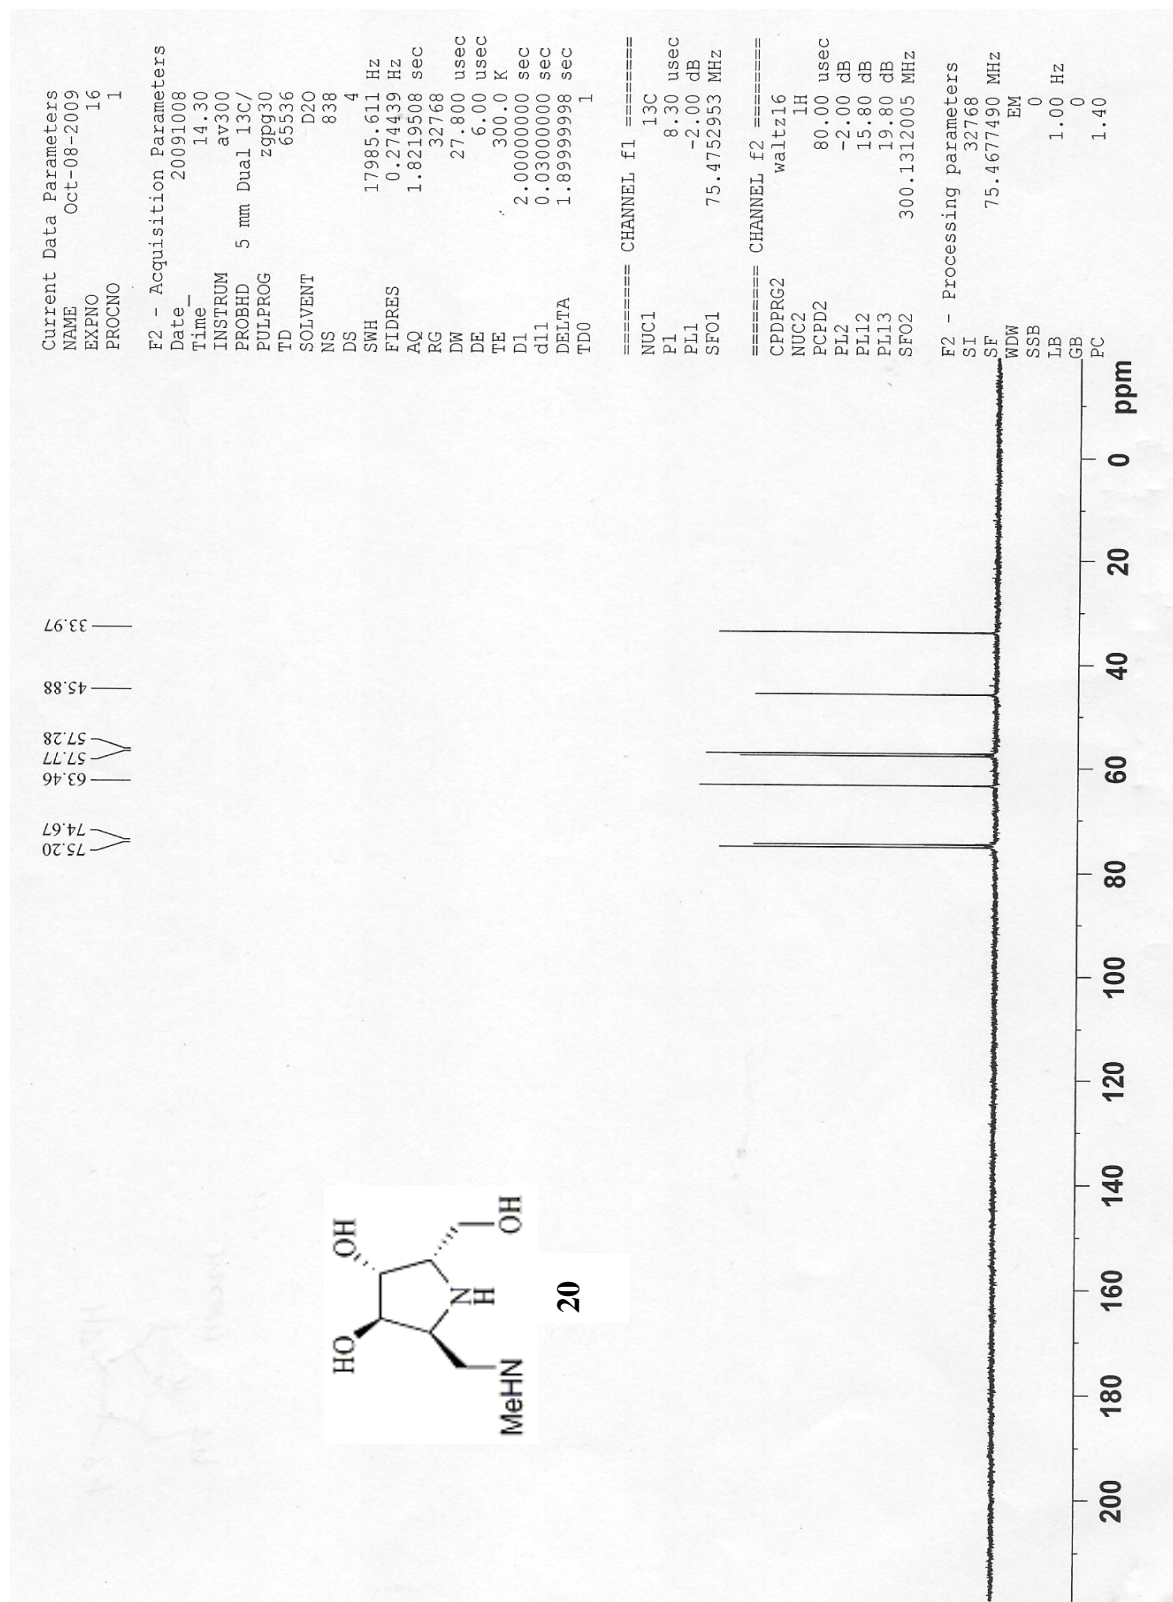

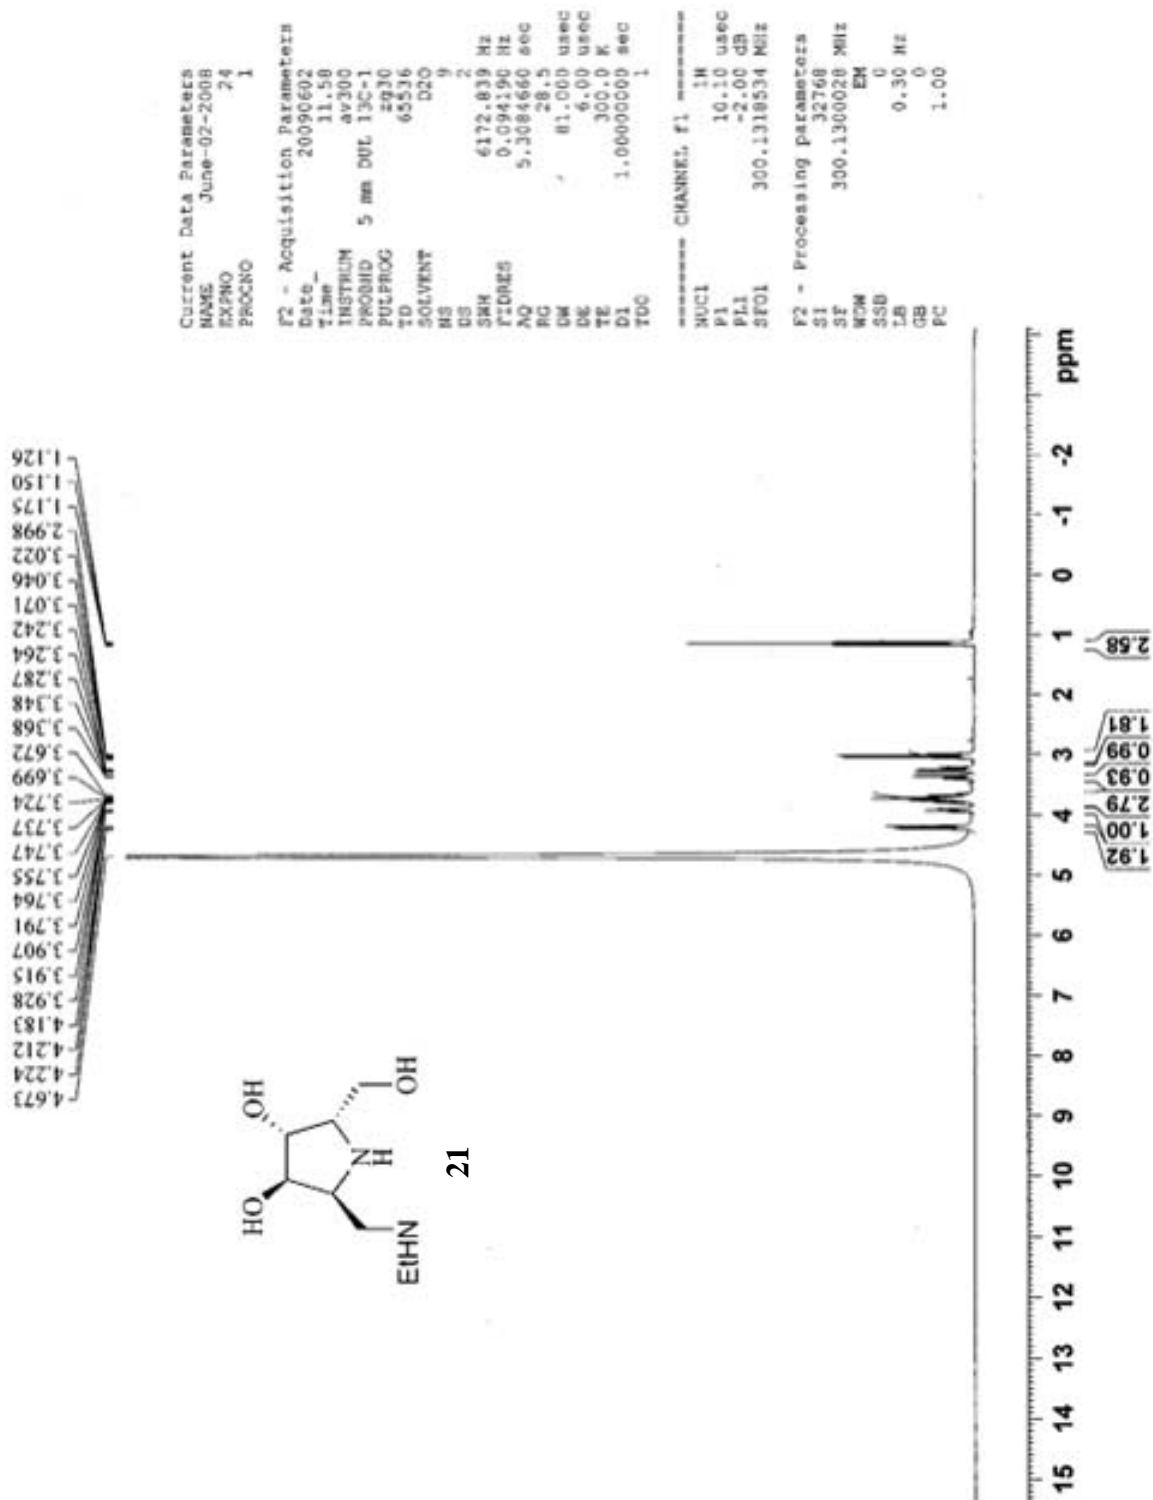

Current Data Parameters  
NAME June-05-2008  
EXPNO 1  
PROCNO 1

F2 - Acquisition Parameters  
Date\_ 20090605  
Time 9.40  
INSTRUM av300  
PROBHD 5 mm DUL 13C-1  
PULPROG zgpg30  
TD 65536  
SOLVENT D2O  
NS 408  
DS 4  
SWH 17985.611 Hz  
FIDRES 0.274439 Hz  
AQ 1.8219508 sec  
RG 32768  
DW 27.800 usec  
DE 6.00 usec  
TE 300.0 K  
D1 2.00000000 sec  
d11 0.03000000 sec  
DELTA 1.89999998 sec  
TDO 1

==== CHANNEL f1 =====  
NUC1 13C  
P1 8.30 usec  
PL1 -2.00 dB  
SFO1 75.4752953 MHz

==== CHANNEL f2 =====  
CPDPRG2 waltz16  
NUC2 1H  
PCPD2 80.00 usec  
PL2 -2.00 dB  
PL12 16.00 dB  
PL13 20.00 dB  
SFO2 300.1312005 MHz

F2 - Processing parameters  
SI 32768  
SF 75.4677490 MHz  
WDW EM  
SSB 0  
LB 2.00 Hz  
GB 0  
PC 1.40

75.27  
74.85  
62.98  
57.98  
57.12  
44.21  
44.02  
10.61

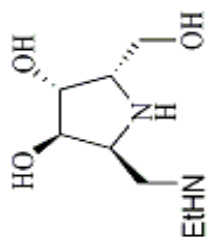

21

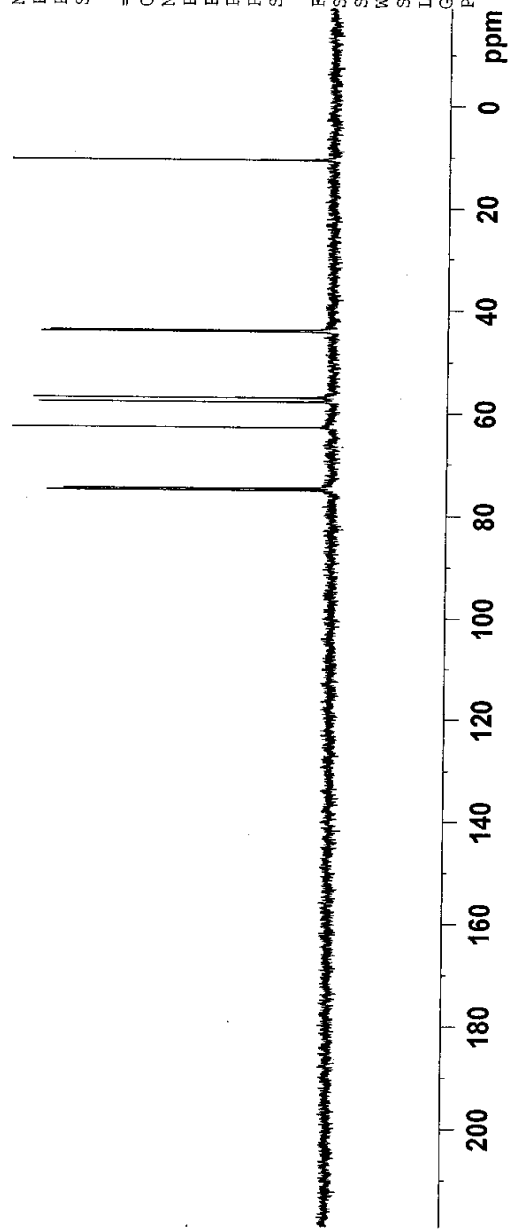

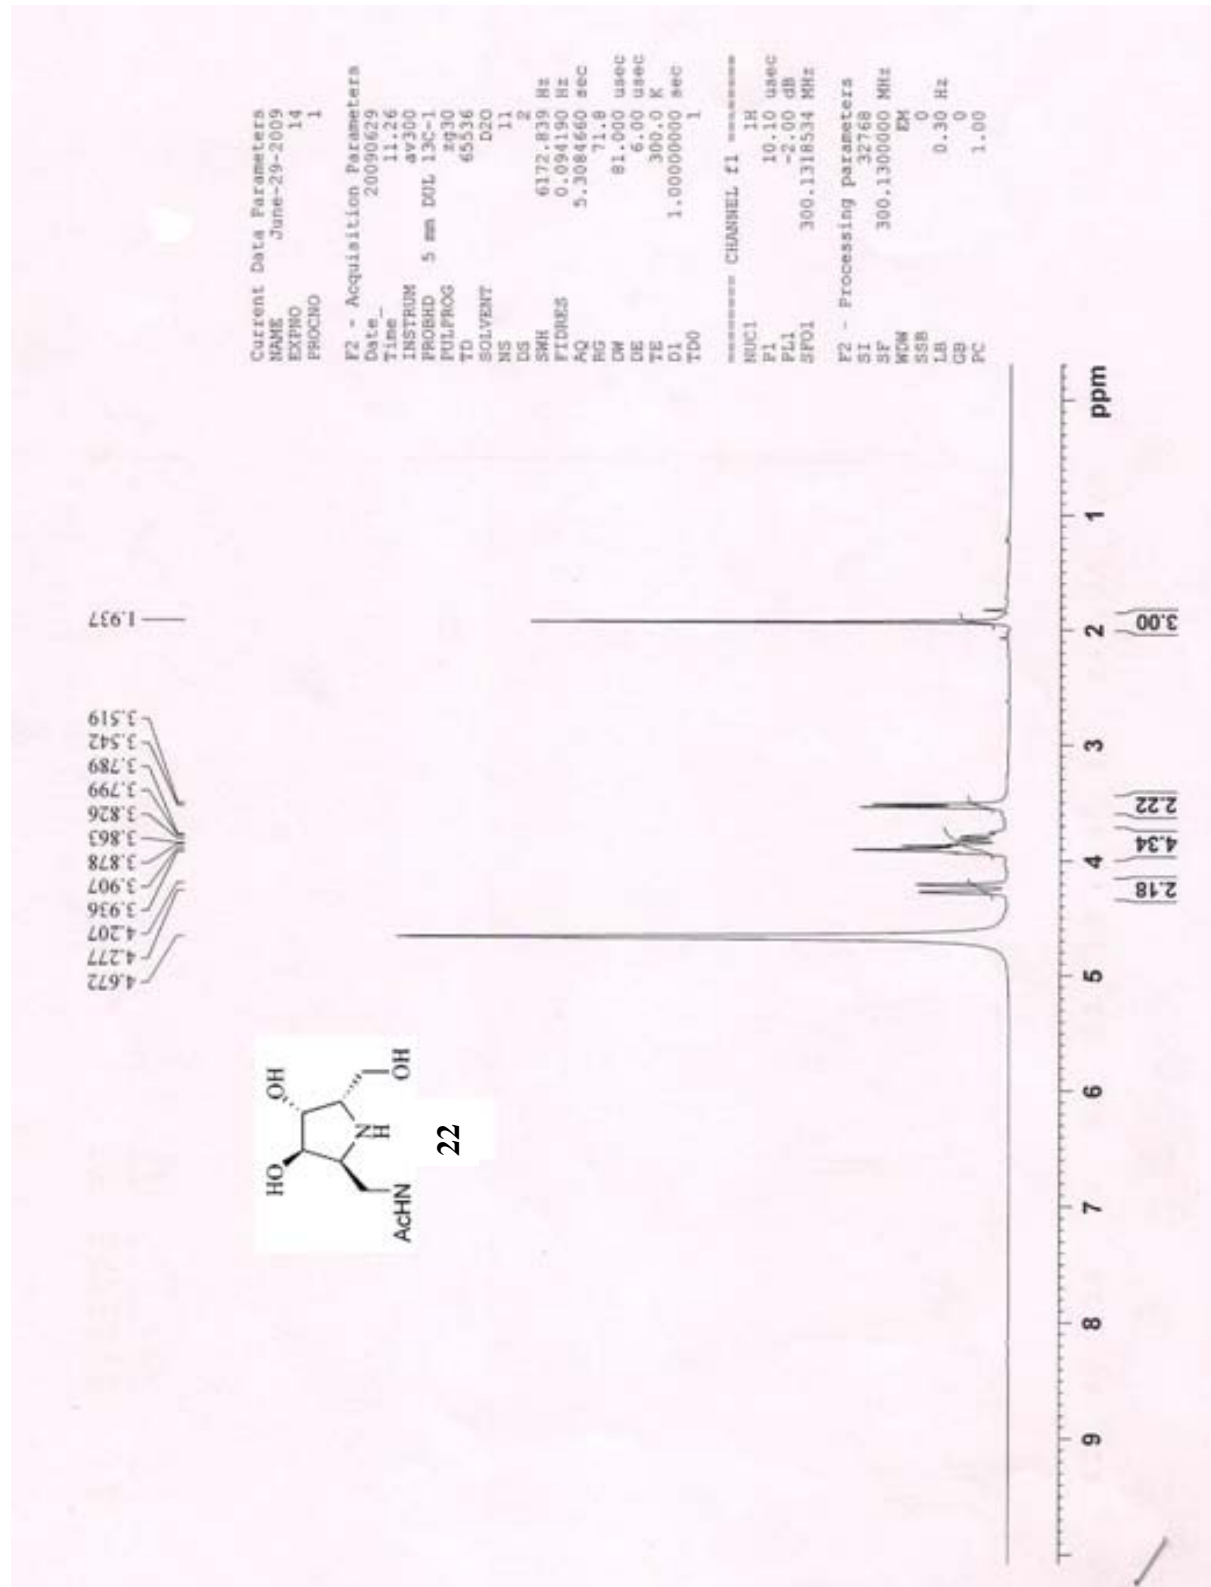



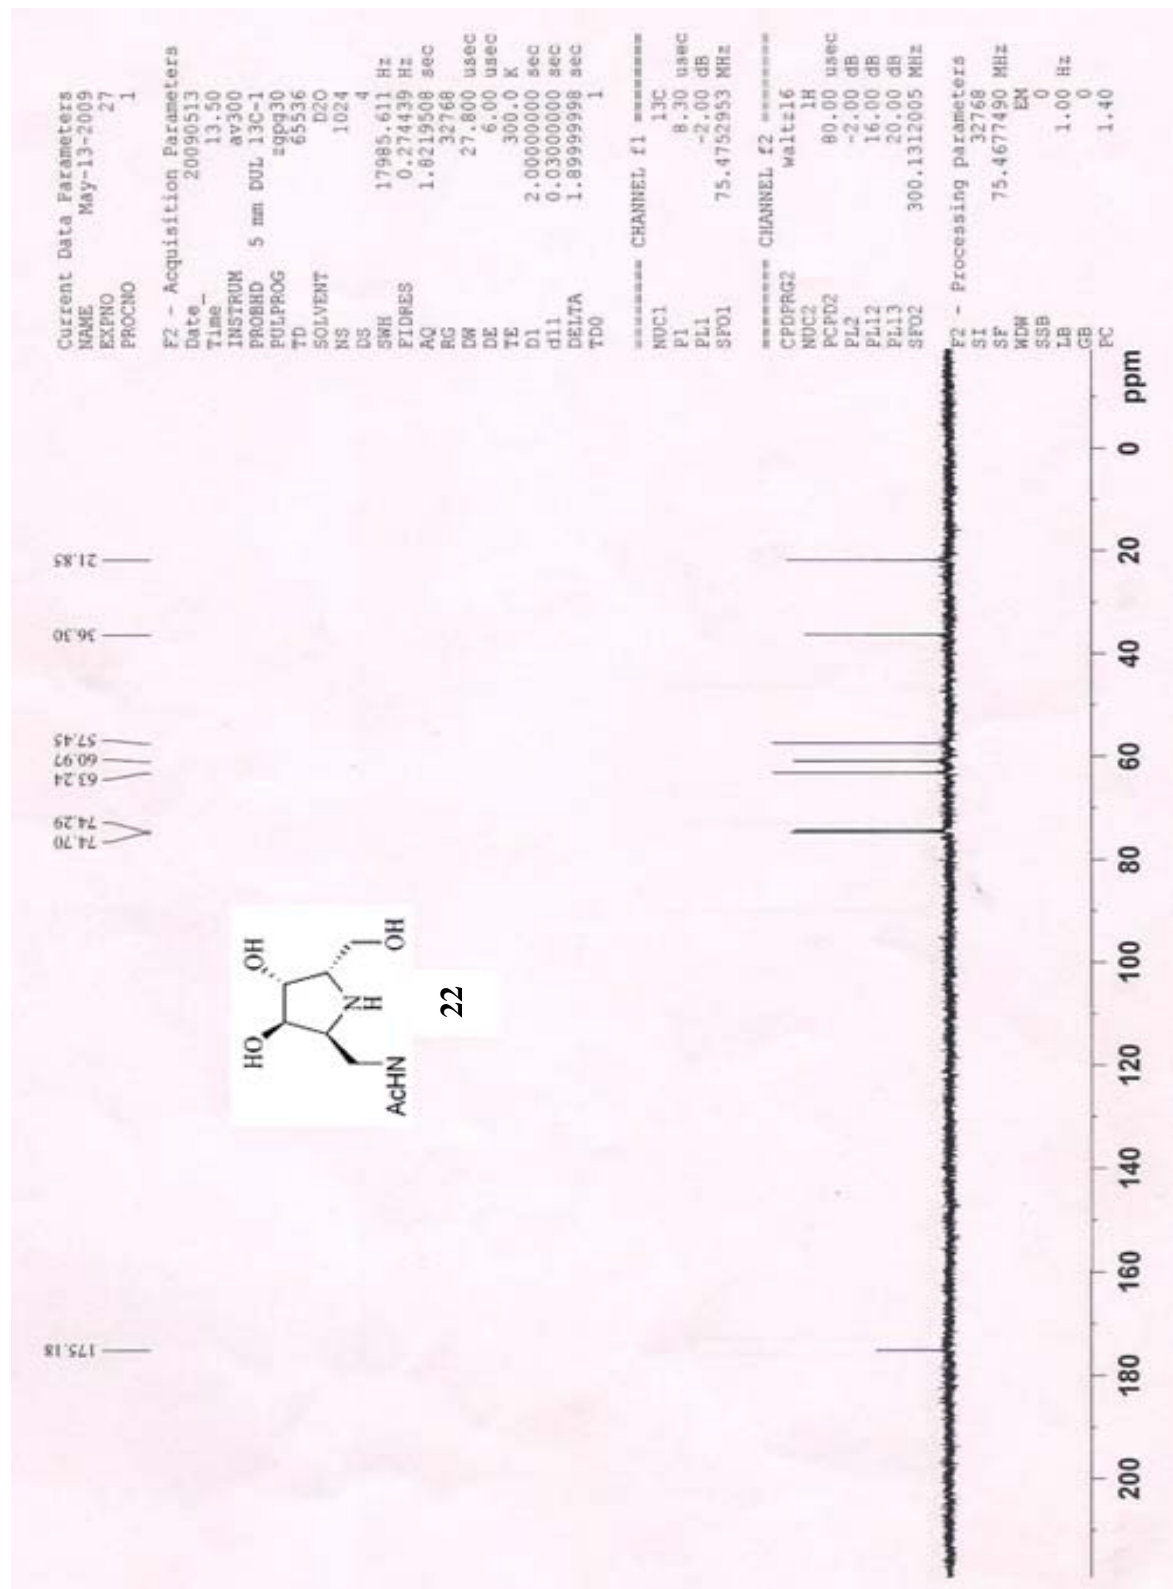

Supplement: b926123k.pdf [file b926123k.pdf]
